# Leptin Resistance in the Ovary of Obese Mice Is Associated with Profound Changes in the Transcriptome of Cumulus Cells

Karolina Wołodko<sup>1</sup>, Edyta Walewska<sup>1</sup>, Marek Adamowski<sup>1</sup>, Juan Castillo-Fernandez<sup>2</sup>, Gavin Kelsey<sup>2,3,\*</sup>, António Galvão<sup>1,2,3,\*</sup>

<sup>1</sup> *Institute of Animal Reproduction and Food Research of PAS, Department of Reproductive Immunology and Pathology, Olsztyn, Poland;*

<sup>2</sup> *Babraham Institute, Epigenetics Programme, Cambridge, CB22 3AT, UK;*

<sup>3</sup> *University of Cambridge, Centre for Trophoblast Research, Cambridge, CB2 3EG, UK.*

This article was first published as a preprint: Wolodko et al (2019). bioRxiv. <https://doi.org/10.1101/729657>

Short title: Obesity-induced leptin resistance results in altered transcription in cumulus cells

---

## \*Corresponding authors:

António Galvão

Antonio.Galvao@babraham.ac.uk

*Epigenetics Programme, Babraham Institute, Cambridge, CB22 3AT, UK*

a.galvao@pan.olsztyn.pl

*Institute of Animal Reproduction and Food Research of PAS, Olsztyn, Tuwima 10, 10-748 Poland*

Gavin Kelsey

Gavin.Kelsey@babraham.ac.uk

*Epigenetics Programme, Babraham Institute, Cambridge, CB22 3AT, UK*

**Keywords:** obesity, cumulus cell, leptin, SOCS3, transcriptome

## 34 ABSTRACT

35 **Background/Aims:** Obesity is associated with infertility, decreased ovarian  
 36 performance and lipotoxicity. However, little is known about the aetiology of these  
 37 reproductive impairments. Here, we hypothesise that the majority of changes in ovarian  
 38 physiology in diet-induced obesity (DIO) are a consequence of transcriptional changes  
 39 downstream of altered leptin signalling. Therefore, we investigated the extent to which  
 40 leptin signalling is altered in the ovary upon obesity with particular emphasis on effects  
 41 on cumulus cells (CCs), the intimate functional companions of the oocyte. Furthermore,  
 42 we used the pharmacological hyperleptinemic (LEPT) mouse model to compare  
 43 transcriptional profiles to DIO. **Methods:** Mice were subjected to DIO for 4 and 16  
 44 weeks (wk) and leptin treatment for 16 days, to study effects in the ovary in components  
 45 of leptin signalling at the transcript and protein levels, using Western blot, Real-time  
 46 PCR and immunostaining. Furthermore, we used low-cell RNA sequencing to  
 47 characterise changes in the transcriptome of CCs in these models. **Results:** In the DIO  
 48 model, obesity led to establishment of ovarian leptin resistance after 16 wk high fat diet  
 49 (HFD), as evidenced by increases in the feedback regulator suppressor of cytokine  
 50 signalling 3 (SOCS3) and decreases in the positive effectors phosphorylation of tyrosine  
 51 985 of leptin receptor (ObRb-pTyr985) and Janus kinase 2 (pJAK2). Transcriptome  
 52 analysis of the CCs revealed a complex response to DIO, with large numbers and  
 53 distinct sets of genes deregulated at early and late stages of obesity; in addition, there  
 54 was a striking correlation between body weight and global transcriptome profile of CCs.  
 55 Further analysis indicated that the transcriptome profile in 4 wk HFD CCs resembled  
 56 that of LEPT CCs, in the upregulation of cellular trafficking and impairment in  
 57 cytoskeleton organisation. Conversely, after 16 wk HFD CCs showed expression  
 58 changes indicative of augmented inflammatory responses, cell morphogenesis, and  
 59 decreased metabolism and transport, mainly as a consequence of the physiological  
 60 changes of obesity. **Conclusion:** Obesity leads to ovarian leptin resistance and major  
 61 time-dependent changes in gene expression in CCs, which in early obesity may be  
 62 caused by increased leptin signalling in the ovary, whereas in late obesity are likely to  
 63 be a consequence of metabolic changes taking place in the obese mother.

64

65

## 66 INTRODUCTION

67 Obesity is considered one of the major public health challenges of modern times and  
68 has been linked to various comorbidities, such as metabolic syndrome, type 2 diabetes,  
69 cancer, stroke (1) and infertility (2). Obese women have increased risk of menstrual  
70 dysfunctions and anovulation, pregnancy complications, and poor reproductive outcome  
71 (3). In mouse models, obesity is characterised by lipid accumulation in the ovary and  
72 ensuing lipotoxicity (4) and oxidative stress (5). Nonetheless, the exact mechanisms  
73 underlying ovarian pathogenesis in the course of obesity remain uncharacterised.

74 Leptin is a cytokine secreted by the adipose tissue (adipokine) (6). Indeed, soon  
75 after the introduction to an obesogenic environment, large amounts of leptin can be  
76 found in the circulation (7), making this adipokine one of the early-onset obesity  
77 markers. Leptin controls food intake through its action at the central nervous system (8);  
78 however, as a pleiotropic adipokine, leptin contributes to the regulation of numerous  
79 processes in the body, such as immune response (9) or angiogenesis (10). Concerning  
80 the reproductive tract, leptin has been shown to control the neuroendocrine reproductive  
81 axis (11) and folliculogenesis (12). Furthermore, leptin has been linked to ovulation  
82 (13) and embryo development (14). Leptin is detected in most cell types in the murine  
83 ovary, with the highest staining intensity seen in the oocyte (15). Nevertheless, no  
84 previous consideration has been made whether leptin signalling is dysregulated in the  
85 obese ovary. The leptin receptor b (ObRb) is a type I cytokine receptor, which signals  
86 through the association with the tyrosine kinase Janus kinase 2 (JAK2). Upon leptin  
87 binding and dimerization of the receptor, JAK2 is recruited (16), mediating the  
88 phosphorylation of three conserved tyrosine residues on the intracellular domain of the  
89 receptor: tyrosine (Tyr) 985, Tyr1077 and Tyr1138. Subsequently, signalling molecules  
90 are recruited to these activated tyrosines (17) and, as a result, the signal transducer and  
91 activator of transcription (STAT) 5 and/or STAT3 are also phosphorylated and  
92 translocated into the nucleus, where they regulate transcription (8,18). During sustained  
93 activation of ObRb, the expression of both suppressor of cytokine signalling 3 (SOCS3)  
94 and tyrosine-protein phosphatase 1B (PTP1B) is initiated as a negative feedback  
95 response (19,20). While PTP1B dephosphorylates JAK2, SOCS3 binds to receptor  
96 domains within JAK2 and Tyr985 and terminates signal transduction.

97 To date, little is known about the integrity of leptin signalling in the ovary  
98 during obesity progression, and its particular impact on the cumulus oophorous complex  
99 (COC). Cumulus cells (CCs) are vital regulators of oocyte growth and metabolism (21),  
100 controlling meiosis resumption (22), as well as the ovulation process itself (23). Thus, a

101 better knowledge of the pathophysiology of the events taking place in these cells in the  
102 course of obesity will allow us to understand the molecular mechanisms leading to  
103 impaired ovarian performance and infertility. Furthermore, the transcriptional signature  
104 of CCs has been used to predict oocyte competence or embryo quality (24,25),  
105 demonstrating the importance of such references in assisted reproduction techniques.  
106 Here, we first characterise the establishment of leptin resistance in whole ovaries from  
107 diet induced obesity (DIO) mice fed for 4 and 16 weeks (wk). Subsequently, we  
108 analysed the transcriptome of CCs throughout obesity progression and identify  
109 temporally altered gene expression signatures. Finally, using a mouse model for  
110 pharmacological hyperleptinemia (LEPT), we pinpoint the transcriptional events  
111 mediated by increased leptin signalling in CCs in the early stages of obesity.

112

## 113 MATERIALS AND METHODS

### 114 *Animal protocol*

115 Breeding pairs from mouse strains C57BL/6J (B6) and B6.Cg-Lep<sup>ob</sup>/J (*ob/ob*) were  
116 obtained from the Jacksons Laboratory (The Jacksons Laboratory, Bar Harbour, Maine,  
117 USA). At 8 wk of age B6 animals were divided into 2 groups (n=12/ group). In DIO,  
118 the control group was fed *ad libitum* chow diet (CD, 11% energy in kcal from fat, 5053,  
119 rodent diet 20, LabDiet IPS, London, UK), while the experimental group received high  
120 fat diet (HFD, 58% energy in kcal from fat, AIN-76A 9G03, LabDiet IPS). Mice were  
121 maintained on the respective diet for 4 or 16 wk. Regarding the pharmacological  
122 hyperleptinemia protocol, 8 wk old B6 female mice fed CD were divided into two  
123 groups (n=15/group): i) saline 16 days (d) (CONT); ii) leptin 16 d (Recombinant Mouse  
124 Leptin, GFM26, Cell Guidance Systems, Cambridge, UK). The animals were injected  
125 intraperitoneally twice a day, at 09:00 h and 21:00 h and total dosage of 100 µg/day of  
126 leptin was administrated. Concerning the *ob/ob* model, mice were kept from weaning  
127 until twelve wk of age on CD. For all protocols, mice were housed with a 12 h light/12  
128 h dark cycle at room temperature (23±, RT).

129 For phenotype characterisation of DIO, changes in body composition were  
130 monitored every 4 wk by nuclear magnetic resonance (NMR, Bruker, Rheinstetten,  
131 Germany), whereas in the LEPT model animals were phenotyped every three days.  
132 Body weight (BW), fat mass (FM), lean mass (LM), adiposity index (AI, fat mass/lean  
133 mass), and food intake (FI) were measured. For DIO and LEPT models vaginal  
134 cytology was done at 9:00 h, for twelve consecutive days. After vaginal lavage with  
135 saline, the smears were placed on clean glass slides and stained with Diff Quick

136 Staining Set (Diff- Quick Color Kit, Rapid Staining Set, Medion Grifols Diagnostics  
137 AG, Duedingen, Switzerland), for cell identification as previously described (26). The  
138 results were analysed for percent of time spent in oestrous stage (further explained in  
139 Figure supplement 1J, 1K; Figure supplement 6G). All samples for mRNA, protein  
140 analysis and staining were collected at the oestrus stage.

141 A superovulation protocol was used for COC collection and further isolation of a  
142 pure population of CCs after removing the metaphase II (MII) oocytes. This  
143 developmental state of granulosa cells (GC) was preferred to ensure a tightly controlled  
144 level of progression. The animals were injected with pregnant mare's serum  
145 gonadotropin (PMSG, G4877, 5IU, Sigma Aldrich, Saint Louis, Missouri, USA)  
146 followed after 48 h by human chorionic gonadotropin (hCG, Chorulon, 5IU, MSD  
147 Animal Health, Boxmeer, Holland). Subsequently, 18 h after hCG injection the animals  
148 were sacrificed.

149

# 150 *Ovary collections*

151 Mice were sacrificed by cervical dislocation and the reproductive tracts collected and  
152 rinsed with phosphate buffered saline (PBS, 0.1M, pH=7.4). Ovaries were then removed  
153 from the genitalia and cleaned of adipose tissue. Ovaries were stored either in TRI  
154 Reagent (T9424, Sigma Aldrich) for mRNA, or radioimmunoprecipitation assay buffer  
155 (RIPA, 89901, ThermoFisher Scientific, Waltham, Massachusetts, USA) supplemented  
156 with protease inhibitor cocktail (PIC, P8340, Sigma Aldrich), phenylmethylsulfonyl  
157 fluoride (PMSF, P7626, Sigma Aldrich) and phosphatase inhibitor (88667, Thermo  
158 Fisher Scientific), for protein analysis. Samples were stored in -80°C, except for the  
159 analysis of phosphorylated proteins, in which samples were isolated immediately after  
160 sacrificing the animals.

161

# 162 *Ovarian cell isolation protocol*

163 For theca and stroma enriched (TC) fraction collection, immediately after culling the  
164 animals, ovaries were transferred to Dulbecco's modified Eagle's medium (DMEM,  
165 D/F medium; 1:1 (v/v), D-8900, Sigma Aldrich) with 3% bovine serum albumin (BSA,  
166 735078, Roche Diagnostics GmbH, Mannheim, Germany), 20 µg/ml gentamicin  
167 (G1397, Sigma Aldrich) and 250 µg/ml amphotericin (A2942, Sigma Aldrich). For the  
168 TC fraction, ovaries were punctured with a 16 gauge needle as described before (27).  
169 Briefly, after removing GC and oocytes, the remaining tissue was washed twice with  
170 media and stored in TRI Reagent for mRNA analysis (n=8/group). For CCs, after

171 superovulating the animals, COCs were retrieved from oviducts, and further digested  
172 with hyaluronidase (H3506, 400 µg/ml, Sigma Aldrich). After removing the oocytes, a  
173 total of approximately 50 pure CCs were collected from one individual animal from  
174 either 4 wk or 16 wk DIO (n=5/ condition), as well as the 16 d LEPT (n=at least 3/  
175 condition) protocol.

176

#### 177 *RNA isolation and cDNA synthesis*

178 For mRNA extraction, either whole ovaries or TC fraction were collected from mice in  
179 oestrus stage, placed in 1 ml of TRI Reagent in 1.5 ml eppendorf tubes (n=8/ group) and  
180 mechanically disrupted with a lancet. The suspension was pipetted up and down  
181 vigorously and incubated for 5 minutes (min) at RT. After centrifugation (9400 g, 4□,  
182 15 min), the supernatant was transferred to a fresh tube and thoroughly mixed with 100  
183 µl of 1-Bromo-3-chloropropan (BCP, BP151, Molecular Research Centre, Cincinnati,  
184 Ohio, USA), followed by incubation at RT for 10 min. Subsequently, samples were  
185 centrifuged (13500 g, 4□, 15 min) and the aqueous phase transferred to a new tube,  
186 before being mixed with an equal volume of isopropanol and incubated at -80°C for 60  
187 min. Another centrifugation (20000 g, 4□, 15 min) to pellet down the RNA, which was  
188 then washed three times with 75% ethanol and incubated overnight in -80°C. Next day,  
189 samples were centrifuged (20000 g, 4□, 15 min) and the RNA pellet dried and  
190 resuspended in 20 µl of RNase free water (W4502, Sigma Aldrich), supplemented with  
191 RNase Inhibitor (RiboProtect, RT35, BLIRT, Gdańsk, Poland). Finally, RNA quality  
192 and concentration were assessed with NanoDrop. Absorbance ratio at 260 nm and 280  
193 nm (A260/A280) was determined and the quality and concentration of isolated mRNA  
194 confirmed.

195 A total of 1 µg of RNA was reversely transcribed using Maxima First Strand  
196 cDNA Synthesis Kit for Real-time polymerase chain reaction (PCR) (K1642,  
197 ThermoScientific) according to the manufacturer's instructions. The cDNA was stored  
198 in -20°C until the real-time PCR was carried out.

199

#### 200 *Real-time polymerase chain reaction*

201 Real-time PCR was performed in a 7900 Real-Time PCR System (Applied Biosystems,  
202 Warrington, UK) using Maxima SYBR Green/ROX qPCR Master Mix (K0223,  
203 ThermoScientific). Primers were designed using Primer 3.0 v.0.4.0. software (28),  
204 based on gene sequences from GeneBank (NCBI), as described before (29). All primers  
205 were synthesised by Sigma Aldrich. Primer sequences, expected PCR products length,

206 and GeneBank accession numbers are reported in Table 1. The total reaction volume  
207 was 12 µl, containing 4 µl cDNA (10µg), 1 µl each forward and reverse primers (80 nM  
208 or 160 nM), and 6 µl SYBR Green PCR master mix. Real-time PCR was carried out as  
209 follows: initial denaturation (10 min at 95°C), followed by 45 cycles of denaturation (15  
210 s at 95°C) and annealing (1 min at 60°C). After each PCR, melting curves were obtained  
211 by stepwise increases in temperature from 60 to 95°C to ensure single product  
212 amplification. In each real-time assay, both the target gene and a housekeeping gene  
213 (HKG) - *Ribosomal Protein L37* (*Rpl37*, primers in Table 1) or *Eukaryotic Translation*  
214 *Initiation Factor 5A* (*Eif5a*, primers in Table 1) - were run simultaneously and reactions  
215 were carried out in duplicate wells in a 384-well optical reaction plate (4306737,  
216 Applied Biosystems). The HKG selection was performed with NormFinder, in each  
217 experimental group. Real-time PCR results were analysed with the Real-time PCR  
218 Miner algorithm (30).

219

## 220 *Western blot*

221 Protein expression was assessed by western blot (n=5/group). Ovaries from mice in  
222 oestrus stage were collected into RIPA supplemented with inhibitors and mechanically  
223 disrupted with a lancet. Then, lysates were incubated for one hour on ice, with mixing  
224 every 15 min. Subsequently, samples were centrifuged (20000 g, 4°C, 15min) and the  
225 supernatant was collected and stored in -80°C until the analysis. The protein  
226 concentration was assessed using bicinchoninic acid assay (BCA, BCA1-1KT, Sigma  
227 Aldrich). A total of 10-40 µg of protein was loaded on 8-14% acrylamide gel, and after  
228 electrophoresis proteins were transferred to polyvinylidene difluoride (PVDF) or  
229 nitrocellulose membrane depending on the antibodies to be used. Membranes were  
230 blocked in 5% BSA (A2153, Sigma Aldrich) and incubated with primary antibodies  
231 (AB) overnight at 4°C. Leptin receptor and its phosphorylated domains were evaluated  
232 using the following antibodies: mouse monoclonal (MM) against leptin receptor (ObR;  
233 1:500, cat# sc-8391, Santa Cruz Biotechnology, Dallas, Texas, USA), goat polyclonal  
234 (GP) against phosphorylated Tyr 985 ObRb (pTyr985ObRb; 1:500, cat# sc-16419,  
235 Santa Cruz Biotechnology), rabbit polyclonal (RP) against phosphorylated Tyr 1077  
236 ObRb (pTyr1077ObRb; 1:500, cat# 07-1317, Merck Millipore, Burlington, Vermont,  
237 USA), GP against phosphorylated Tyr 1138 ObRb (pTyr1138ObRb; 1:500, cat# sc-  
238 16421, Santa Cruz Biotechnology). The expression of other leptin signalling pathway  
239 components was assessed using the following antibodies: RP against JAK2 (1:200, cat#  
240 sc-294, Santa Cruz Biotechnology), RP against phosphorylated Tyr 1007/1008 JAK2



(pJAK2; 1:200, cat# sc-16566-R, Santa Cruz Biotechnology), RP against STAT3 (1:200, cat# sc-482, Santa Cruz Biotechnology), MM against phosphorylated Tyr 705 pSTAT3 (1:200, cat# sc-8059, Santa Cruz Biotechnology), RP against STAT5 (1:200, cat# sc-835, Santa Cruz Biotechnology), MM against phosphorylated Tyr 694/699 pSTAT5 (1:200, cat# sc-81524, Santa Cruz Biotechnology), GP against PTP1B (1:200, cat# sc-1718, Santa Cruz Biotechnology), MM against SOCS3 (1:500, cat# sc-51699, Santa Cruz Biotechnology) in cell lysates. The results were normalized with  $\beta$ -actin (1:10000, MM, cat# A2228, Sigma-Aldrich). All antibodies specifications are summarised in Table 2. Proteins were detected after incubation of the membranes with secondary GP anti-rabbit alkaline phosphatase-conjugated antibody (1:30000, cat# A3687, Sigma Aldrich), GP anti-mouse alkaline phosphatase-conjugated antibody (1:20000, cat# 31321, ThermoScientific), RP anti-goat alkaline phosphatase-conjugated (1:30000, cat# A4187, Sigma Aldrich), or RP anti-goat horseradish peroxidase- conjugated antibody (1:75000, cat# A50-100P, Bethyl, Montgomery, Alabama, USA) for 2 h at RT. Immune complexes were visualized using the alkaline phosphatase visualization procedure or ECL substrate visualization. Blots were scanned in a Molecular Imager VersaDoc MP 4000 System (BioRad, Hercules, California, USA) and specific bands quantified using ImageLab Software (BioRad). Finally, band density for each protein was normalised against  $\beta$ -actin.

260

# 261 *Immunohistochemistry and immunofluorescent staining*

262 Ovaries collected from mice in oestrus stage (n=3/group) were fixed in 4% neutral phosphate-buffered formalin (NBF, 432173427, Poch, Gliwice, Poland) at 4°C for 24 h, 263 and subsequently dehydrated in ethanol. Paraffin embedded ovarian tissues were 264 sectioned into 5  $\mu$ m slices. For antigen retrieval, sections were heated in citrate buffer (10 mM, pH=6.0). Tissue was incubated in blocking solution (ab64261, Abcam, 265 Cambridge, UK) for 1 h at RT and primary RP anti-SOCS3 antibody (1:1000, ab16030, 266 Abcam) or primary RP anti-PTP1B antibody (1:500, ab189179, Abcam) added 267 overnight at 4°C. The negative control sections were incubated with RP anti- 268 immunoglobulin G (IgG, cat# ab37415, Abcam) or without primary antibody. The 269 primary antibody complexes were detected after incubating the tissue with biotinylated 270 goat anti-rabbit IgG (H+L) (ab64261, Abcam) for 60 min, and streptavidin peroxidase 271 for 40 min. Staining was evident after 15 s incubation in 3,3-diaminobenzidine (DAB) 272 peroxidase substrate solution (Rabbit-specific HRP/DAB (ABC) Detection IHC Kit, 273 ab64261, Abcam). Subsequently, samples were counterstained with haematoxylin 274 275



(MHS16, Sigma Aldrich) and mounted. Sections were examined using Axio Observer Systems Z1 microscope (Carl Zeiss Microscopy GmbH, Hannover, Germany) and Zeiss ZEN 2.5 lite Microscope Software (Carl Zeiss, Germany). For immunofluorescence (IF), 5 µm sections were deparaffinised and rehydrated in an ethanol series. Next, tissues were permeabilised in 0.3% Triton X-100 (T8787, Sigma Aldrich), followed by antigen retrieval in citrate buffer (10 mM, pH=6.0) for 40 min in 90° and blocking in 2% BSA (A2153, Sigma Aldrich) with 0.3 M glycine (G8898, Sigma Aldrich) in PBS-0.1% Tween 20 (P7949, Sigma Aldrich) (PBST) solution. Sections were then incubated with 0.3% Sudan Black (199664, Sigma Aldrich) in 70% ethanol for 10 min at RT, followed by washes in PBST. Slides were subsequently incubated with RP anti-SOCS3 antibody (1:200, ab16030, Abcam) overnight at 4°C. The negative control sections were incubated with RP anti-IgG (1:200) as before, or without primary antibody. On the next day slides were washed in PBST, followed by incubation with cyanine 3 (Cy3)- donkey polyclonal anti-rabbit IgG (H+L) (711-165-152, Jackson ImmunoResearch, Cambridgeshire, UK), and a series of washes in PBST. Finally, slides were covered with a drop of Prolong Gold medium with diamidino-2-phenylindole (DAPI) and sealed with cover slips. Images were captured using 40x/1.2A or 63x/1.4A oil immersion objectives on a LSM800 confocal microscope (Carl Zeiss, Germany).

294

#### 295 *Enzyme-linked immunosorbent assay*

296 Animals in oestrus were sacrificed (n=8/group) and blood samples collected after  
297 puncturing the heart. Blood samples were centrifuged (180 g, 4°, 10 min) and plasma  
298 stored at -80°. Levels of circulating leptin and insulin were assessed with enzyme-  
299 linked immunosorbent assay (ELISA) kit, according to the manufacturer's instructions  
300 (Mouse Leptin ELISA Kit, 90030; Crystal Chem, Zaandam, Netherlands; Rat/Mouse  
301 Insulin ELISA Kit, cat. EZRMI-13K; Merck Millipore). The intra- and interassay  
302 coefficients of variation (CVs) were as follows: for Leptin ELISA kit <10% both and for  
303 Insulin ELISA kit 8.35% and 17.9%, respectively. To determine SOCS3 in ovarian  
304 extracts, ELISA test was used (ELISA KIT for SOCS3; cat no SEB684Mu, Cloud-  
305 Clone, Texas, USA). Briefly, the tissue was minced in lysis buffer (n=8/group),  
306 centrifuged (10000 g, 4°, 5 min) and protein concentration in the lysate determined with  
307 BCA test. All tests and assessments were performed according to the manufacturer's  
308 instructions.

309

#### 310 *RNA-seq library generation*

311 Once the 16 wk HFD group presented divergence in BW gain, we identified 3 animals  
 312 with less than 33 g of body weight that we designated as HFD low gainers (HFDLG)  
 313 and excluded them from the regular HFD group for the further description of differently  
 314 expressed genes (DEGs) between CD and HFD. CCs were collected into RLT buffer  
 315 (1053393, Qiagen, Hilden, Germany) and kept at -80°C until library generation.  
 316 Subsequently, RNA sequencing (RNA-seq) libraries were prepared following a  
 317 previously described protocol (31,32), with minor changes. Briefly, mRNA was  
 318 captured using Smart-seq2 oligo-dT pre-annealed to magnetic beads (MyOne C1,  
 319 Invitrogen, Carlsbad, California, USA). The beads were resuspended in 10 µl of reverse  
 320 transcriptase mix (100 U, SuperScript II, Invitrogen; 10 U, RNAsin, Promega,  
 321 Madison, Wisconsin, USA), 1 × Superscript II First-Strand Buffer, 2.5 mM  
 322 dithiothreitol (DTT, Invitrogen), 1 M betaine (Sigma Aldrich), 9 mM magnesium chloride  
 323 (MgCl<sub>2</sub>, Invitrogen), 1 µM Template-Switching Oligo (Exiqon, Vedbaek, Denmark), 1  
 324 mM deoxyribonucleotide triphosphate (dNTP) mix (Roche) and incubated for 60 min at  
 325 42°C followed by 30 min at 50°C and 10 min at 60°C (31,32). Amplification of the  
 326 cDNA was then undertaken after adding 11 µl of 2 × KAPA HiFi HotStart ReadyMix  
 327 and 1 µl of 2 µM ISPCR primer (31,32), followed by the cycle: 98°C for 3 min, then 9  
 328 cycles of 98°C for 15 s, 67°C for 20 s, 72°C for 6 min and finally 72°C for 5 min.  
 329 Finally, the cDNA was purified using a similar volume of AMPure beads (Beckman  
 330 Coulter, Brea, California, USA) and eluted into 20 µl of nuclease-free water (P1195;  
 331 Promega). All libraries were prepared from 100 to 200 pg of cDNA using the Nextera  
 332 XT Kit (Illumina, San Diego, California, USA), according to the manufacturer's  
 333 instructions. The final cDNA libraries were purified using a 0.7:1 volumetric ratio of  
 334 AMPure beads before pooling and sequencing on an Illumina Nextseq500 instrument in  
 335 75-base pair (bp) single-read high output mode at the Babraham Institute Sequencing  
 336 Facility. A total of 5-10 million mappable reads per sample were obtained, with an  
 337 average of 30-50 million reads per condition.

338

### 339 *Library mapping and trimming*

340 Trim Galore v0.4.2 was used with default parameters on raw Fastq sequence files.  
 341 Mapping of the RNA-seq data was done with Hisat v2.0.5 against the mouse GRCm38  
 342 genome, as guided by known splice sites taken from Ensemble v68.

343

### 344 *RNA-seq differential expression analysis*

345 Mapped RNA-seq reads were quantified and analysed using SeqMonk version v1.45.4  
346 (<http://www.bioinformatics.babraham.ac.uk/projects/seqmonk/>). Differential expression  
347 analysis was performed using DESeq2 (33) implemented in SeqMonk setting a false  
348 discovery rate (FDR) < 0.05.

349

### 350 *Statistical analysis*

351 Statistical analysis was performed using GraphPad Prism 7.0. The D'Agostino-Pearson  
352 omnibus normality test was performed followed by nonparametric Mann-Whitney test  
353 or multiple unpaired t-test with statistical significance determined using the Bonferroni-  
354 Sidak method, depending on the experiment. The data are shown as the mean  $\pm$  SD of  
355 three or more independent replicates. Significance was defined as values of  $p < 0.05$ .

356

### 357 *Statement of Ethics*

358 All experiments were approved by Local Committee for the Ethical Treatment of  
359 Experimental Animals of Warmia- Mazury University (Agreement No. 80/2015,  
360 15/2018, 38/2018), Olsztyn, Poland and were performed accordingly to the Guide for  
361 Care and Use of Laboratory Animals, endorsed by European legislation.

362

## 363 **RESULTS**

### 364 ***1. Leptin signalling is impaired in the ovary of diet-induced obese mice***

365 Initially we sought to characterise changes in leptin signalling in the ovary throughout  
366 DIO. Thus, mice were subjected to HFD for 4 and 16 wk and whole ovaries and TC  
367 fraction were collected for mRNA or protein analysis (Figure 1A). Oestrous stage was  
368 followed for twelve consecutive days, confirming that samples were collected in oestrus  
369 (Figure supplement 1J, 1K) in cycling animals. Mice significantly gained BW and FM  
370 already at 4 wk, with an average absolute gain in BW of 13 grams (g) in the 16 wk HFD  
371 group (Figure supplement 1A;  $p < 0.0001$ ). Three animals with comparable FI but BW  
372 gain less than 13 g were excluded from the statistical analysis and designated as HFD-  
373 low gainers (HFDLG). Also, after 4 and 16 wk HFD we confirmed high plasma levels  
374 of insulin (Figure supplement 1F;  $p < 0.01$ ,  $p < 0.001$  respectively) and leptin (Figure  
375 supplement 1G;  $p < 0.01$ ,  $p < 0.001$  respectively) and the establishment of impaired  
376 glucose tolerance and insulin resistance at 16 wk HFD (Figure supplement 1H, 1I;  
377  $p < 0.01$ ,  $p < 0.001$  respectively). Monitoring oestrous cycle revealed that the 4 wk HFD  
378 group had higher prevalence of oestrus counts compared with controls fed CD, whereas

379 in the 16 wk HFD group there was a reduction in pro-oestrus (Figure supplement 1J,  
380 1K;  $p < 0.05$ ,  $p < 0.01$  respectively).

381 Next, we isolated protein from whole ovaries and studied the abundance of  
382 components of the leptin signalling pathway. Whilst we found initial hyperactivation of  
383 leptin signalling pathway as demonstrated by upregulation of SOCS3 protein (Figure  
384 1B; Figure Supplement 2H;  $p < 0.05$  both) and a tendency to increased phosphorylation  
385 of STAT3 (Figure supplement 2E;  $p = 0.06$ ), after 16 wk HFD local leptin resistance was  
386 clearly established. This was evidenced by the decrease in abundance of leptin receptor  
387 (Figure supplement 2A;  $p < 0.01$ ), and a trend towards decreased phosphorylation of  
388 pTyr985 ObRb (Figure 1C;  $p = 0.09$ ) and decreased phosphorylation of JAK2 (Figure  
389 1D;  $p < 0.05$ ), along with upregulation of SOCS3 (Figure 1B;  $p < 0.001$ , Figure  
390 supplement 2H;  $p < 0.05$ ). In contrast, no differences were found in phosphorylation of  
391 other Tyr residues of ObRb (Figure supplement 2C and 2D) or in PTP1B expression  
392 (Figure supplement 2G). Additionally, there was reduced phosphorylation of STAT5  
393 after 4 and 16 wk HFD (Figure supplement 2F; both  $p < 0.01$ ).

394 Next, we sought to characterise the extent to which various ovarian components  
395 responded similarly to increased circulating leptin during obesity. We performed real-  
396 time PCR analysis of whole ovaries and TC fraction. Despite no significant changes  
397 after 4 wk HFD, the mRNA of *Socs3* was increased after 16 wk HFD in both whole  
398 ovary (Figure 1E;  $p < 0.05$ ) and TC (Figure 1E;  $p < 0.001$ ), in comparison to the CD group.  
399 Additionally, the mRNA level of *Ptp1b* was increased in both whole ovary and TC after  
400 16 wk HFD (Figure 1E;  $p < 0.01$ ,  $p < 0.001$  respectively).

401 The aforementioned results suggested that SOCS3 could be an important player  
402 in the establishment of leptin resistance in the ovary of obese mice. Therefore, we  
403 examined SOCS3 localisation in ovaries of DIO and the genetically obese model: mice  
404 with a mutation in the obese gene (*ob/ob*). Immunohistochemistry (IHC) revealed the  
405 presence of SOCS3 protein in oocytes from follicles in all developmental stages (Figure  
406 1H-K; Figure supplement 3E, 3F, 3I, 3J); in addition, theca cells and GC from the  
407 respective follicles were stained, as well as the ovarian stroma (Figure 1H-K).  
408 Importantly, we compared the IHC staining of SOCS3 and PTP1B in 16 wk HFD  
409 ovaries, which suggested that SOCS3 is the major ObRb inhibitor being expressed in  
410 the oocyte and GC, as PTP1B protein presented almost no staining in the oocyte (Figure  
411 supplement 3G, 3H, 3K, 3L). As a control for the specificity of the IHC data, we used  
412 confocal microscopy for immunofluorescence detection of SOCS3 on sections from  
413 DIO and leptin-deficient *ob/ob* (-/-) ovaries, confirming the localisation of SOCS3

(Figure 1N-Q) and observing a weaker intensity of SOCS3 in both oocyte and GC in ovaries from *ob/ob* (Figure supplement 3T, 3V) compared to wild type (+/+) (Figure supplement 3S, 3U). These IF results confirmed the specificity of the staining, since SOCS3 is expected to be less abundant in tissues from the *ob/ob* mouse (34). Furthermore, we also inferred that impaired leptin signalling in the ovary is likely to have direct implications for the oocyte, since the gamete was shown to express SOCS3.

## 2. Cumulus cell transcriptome analysis: global transcriptome of CCs reflects body weight

Next, we repeated the protocol and subjected the animals to superovulation in order to collect CCs and analyse the transcriptome from 4 wk and 16 wk DIO protocols (Figure 2A). A total of 50-80 CCs per animal were collected, from which RNA-seq libraries were generated using a Smart-seq2 oligo-dT method (31,32), with separate RNA-seq libraries made from the CC from each female. We then used Principal Component Analysis (PCA) to study the distribution of our samples according to global gene expression profile, and found that principal component 1 (PC1) was mainly driven by BW (Figure 2B). Here we decided to include the HFDLG from the 16wk HFD group as a control, to test whether the transcriptional response could be linked to the BW of the animals; indeed, the HFDLG samples clustered together with 16 wk CD of a similar weight (Figure 2B). The correlation between PC1 and BW was  $r=0.777$  ( $p=3.026e-06$ ) (Figure 2C; table 4), which substantiates the physiological effect driven by BW, rather than the nature of the diet itself, on the global gene expression profile of CCs.

Next, we aimed to identify DEGs in CCs: for this analysis, we excluded the 3 HFDLG outliers from the 16wk HFD, so as to ensure a minimum of 13 g of BW difference between CD 16 wk and HFD 16 wk and a BW difference of 5 g between CD 4 wk and HFD 4 wk (Figure Supplement 1A). After DESeq2 analysis ( $FDR < 0.05$ ), a total of 997 DEGs in 4 wk HFD (373 upregulated and 624 downregulated; Figure 2D; table 5) and 846 DEGs in 16 wk HFD (203 upregulated and 643 downregulated; Figure 2E table 5) were identified. Surprisingly, amongst the DEGs only 52 genes were common between the 4 wk and 16 wk comparisons (Figure 2F), highlighting the differences in pathophysiology of early and late stages of obesity. Gene ontology (GO) (35,36) analysis of the DEG lists showed that transcripts with increased abundance in 4 wk HFD were primarily linked to nitrogen and lipid metabolism and transport, but also cell stress and reactive oxygen species generation (Table 6). Transcripts downregulated after 4 wk HFD were mapped to pathways involved in regulation of macromolecule

449 biosynthesis and gene expression, as well as chromatin organisation/histone  
450 modification and regulation of cell cycle (Figure supplement 4A; Table 6). After 16 wk  
451 HFD treatment, upregulated genes were associated with negative regulation of  
452 development and cellular component organisation, while pathways highlighted for  
453 downregulated genes included localisation, transport and positive regulation of  
454 metabolism (Figure supplement 4B; Table 7). Therefore, in this analysis we identified  
455 the gene signatures in CCs altered at the onset and later development of DIO.

456 Finally, we wished to examine the impact of BW as a factor on gene expression  
457 in CCs. Therefore, we examined the expression of the 846 DEGs identified in 16 wk  
458 HFD group in the 16 wk HFDLG and CD samples. Strikingly, for this set of genes, the  
459 HFDLGs presented an expression pattern closer to 16 wk CD than to 16 wk HFD  
460 (Figure 2G), revealing a very strong correlation between BW and global gene  
461 expression profile in CCs indicative of the impact of female physiology on CCs gene  
462 expression. As CCs represent an important accessible source of biomarkers for the  
463 assessment of reproductive potential of the mother, they are often sampled in assisted  
464 reproductive technologies (ART) to profile biomarkers of oocyte competence or embryo  
465 quality. Thus, we looked for known markers of embryo quality (25) in the 16 wk DEGs  
466 and discovered that *Nfib* was upregulated and *Ptgs2* and *Trim28* transcripts were  
467 downregulated in CCs (Figure supplement 5A-C). The altered expression of these  
468 markers in CCs during late obesity might indicate direct consequences for oocyte and  
469 embryo quality, as previously proposed (24,37–39).

470

### 471 **3. Differential effects on gene expression in CCs early and late in obesity**

472 We next sought to characterise how gene expression in CCs changes between the early  
473 and late stages of DIO. To do this, we first evaluated the expression of the 997 DEGs  
474 from 4 wk and the 846 DEGs from 16 wk HFD at both time-points, aiming to identify  
475 the directionality of gene signatures throughout obesity (Figure 3A). Note that in this  
476 analysis, only a minority of the DEGs are significantly altered at both time points (as  
477 noted above in figure 2F). Only 3 DEGs were upregulated in both conditions (Figure  
478 3A), whereas we found 252 genes upregulated in 4 wk HFD but downregulated in 16  
479 wk HFD, mainly linked to cell transport and localisation. Conversely, the 30 genes  
480 downregulated in 4 wk HFD, but upregulated in 16 wk HFD referred to immune  
481 response (Figure 3A). Finally, a sum of 694 DEGs were downregulated in both 4 and 16  
482 wk HFD, mainly involved in metabolism and transcription (Figure 3A; Table 8). This  
483 analysis revealed a large subset of genes being downregulated throughout obesity, but  
484 also genes with opposite profile which suggest an adaptive response of CCs to changes



in the physiology of the mother. In a parallel approach, we intersected the DEGs datasets from 4wk HFD and 16wk HFD and from the 52 DEGs in common between the two timepoints (Figure 2F) identified 5 main clusters of differently expressed genes. The first 2 clusters comprised 33 genes downregulated in both 4 wk and 16wk HFD (Table 8), with the most significantly deregulated gene at 4 wk HFD *MICAL Like (Micall) 1* (FDR = 0.0002), but other genes like *Dynein cytoplasmic 1 heavy chain (Dync1h)* or *Collagen (Col) 6a3* (Figure 3B; Table 8) were also found. Clusters 3 and 4 revealed the most interesting set of genes concerning disease progression, due to their opposite profile between 4 wk and 16 wk treatment. In cluster 3 we found genes like *Annexin (Anxa) 11* or *Exportin (Xpo) 5* strongly upregulated in 4 wk HFD, but inhibited in 16 wk HFD (Figure 3B), whereas in cluster 4 we found genes like *Ras homology family member U (Rhou)* with opposing profiles at the two time points (Figure 3B). Finally, cluster 5 comprised the 3 genes significantly upregulated throughout obesity (Figure 3B). Therefore, in this analysis we identified gene expression profiles in CCs that represent a valuable tool to assess disease progression in the ovary of obese mice.

500

#### 501 **4. The contribution of leptin to changes in gene expression in CCs from obese mice**

After identifying the major molecular changes in leptin signalling in the ovaries of DIO females, we aimed to establish an *in vivo* system that would expose the ovaries to the elevated levels of circulating leptin, a feature seen in obesity (7), but lacking all remaining traits of obesity. Thus, we conceived a model for pharmacological hyperleptinemia. Sixteen days of leptin treatment resulted in a consistent drop in BW and FM (Figure supplement 6B, 6E;  $p < 0.01$ ) and increased incidence of oestrus (Figure supplement 6G;  $p < 0.05$ ). The ovaries from animals in oestrus stage were collected for mRNA and protein analysis. Whereas injections of 100  $\mu$ g leptin for 9 days did not change the protein expression of leptin signalling molecules (Figure supplement 7A-J), ObR expression and phosphorylation of Tyr985 and STAT5 were decreased after 16 d (Figure supplement 7A, 7B, 7G;  $p < 0.05$ ,  $p = 0.09$ ,  $p < 0.01$  respectively), together with increased SOCS3 (Figure supplement 7I, 7J;  $p < 0.01$ ,  $p < 0.05$  respectively). Validation of a pharmacological hyperleptinemia model allowed us to access ovarian samples from mice with hyperactivation of ObRb, here indicated by increased SOCS3 expression, but lacking the remaining traits of obesity.

Next, we collected CCs from superovulated mice after LEPT treatment and analysed their transcriptome (Figure 4A). After DESeq2 analysis (FDR  $< 0.05$ ), a total of 2026 differently expressed genes were found between LEPT and CONT samples

(1212 genes upregulated and 814 downregulated) (Figure 4B). Gene ontology analysis of the DEG lists showed that the upregulated genes for LEPT were associated primarily with cellular organisation, the cytoskeleton and immune responses, supporting the immune-mediating role of leptin as evidenced before (40–42). Conversely, amongst the LEPT downregulated pathways were cell metabolism as well as chromatin organisation and histone modifications (Figure supplement 8; Table 9). Next, based on the hypothesis that early-onset obesity is followed by hyperactivation of leptin signalling in the ovary, we overlapped both 4wk DIO model and LEPT transcriptome datasets, aiming to pinpoint the LEPT driven effects in the CC transcriptome during early obesity. PCA revealed the clustering of 4 wk DIO and CONT samples, and LEPT samples apart (Figure 4C). Indeed, leptin treatment seemed to drive PC1. Next, we overlapped the DEGs from 4 wk HFD and LEPT protocols and found 144 genes upregulated in both LEPT and 4 wk HFD. These were related to response to toxins, transport and glucose metabolism (Figure 4D; Table 10). More specifically, the genes *Lipocalin (Lcn) 2*, *Anxa11* and *Glucose-6-phosphate dehydrogenase x-linked (G6pdx)* were amongst the most significant (Figure 4D). Conversely, the GO terms associated with the 177 downregulated genes in both protocols were metabolism and gene expression regulation (Figure 4D; Table 10). A number of downregulated genes were found to encode important epigenetic factors, such as *Dna segment, chr 14, abbott 1 expressed o (Tasor)*, *Lysine (k)-specific methyltransferase 2d (Kmt2d/Mll2)*, *Methyl-cpg binding domain protein (Mbd) 2*, and *DNA methyltransferase (Dnmt) 3a* (Figure 4E), which suggested epigenetic dysregulation. Another important effect that could be attributed to leptin in early stages of obesity was the repression of genes mediating actin-cytoskeleton reorganisation (Figure 4F; Table 9). Furthermore, we assessed the potential impact of leptin on genes involved in CC metabolism, and verified the role of leptin on glucose metabolism (Figure 4G) and fatty acid oxidation (Figure 4H), which was reflected in the similarities between LEPT and 4 wk HFD. Here, we questioned how lack of leptin signalling could be detrimental metabolically. For instance, the oocyte is unable to metabolise glucose due to low phosphofructokinase activity (43), highlighting the importance of glycolytic activity of CCs in the generation of pyruvate (44). This function appeared to be decreased in 16 wk HFD, which could be the result of the establishment of leptin resistance in the ovary. As a consequence, the transport of pyruvate into the oocyte would be decreased, which could directly impact the tricarboxylic acid cycle (TCA) and adenosine triphosphate (ATP) generation (Figure supplement 9B) (45). Leptin is also known to be key for free fatty acid (FFA)

metabolism, promoting their oxidation and regulating the homeostasis of triglycerides in a cell (46,47). Thus, disruption of leptin signalling in 16 wk HFD CCs (Figure supplement 9A) could be relevant for lipotoxicity and stress previously described in obese ovaries (48) (Figure supplement 9E, 9F). In general, hyperactivation of leptin signalling in CCs seemed to be linked primarily to impaired cell membrane transport and endocytosis, but also cell metabolism and gene expression regulation.

561

## 562 **DISCUSSION**

The present study characterises the molecular mechanisms underlying the establishment of leptin resistance in the ovary of DIO mice. Furthermore, making use of sensitive methods for reduced-cell number RNA-seq, we studied the transcriptome of the somatic cells surrounding the oocyte from mice subjected to DIO for 4 wk and 16 wk, as well as validated model for pharmacological hyperleptinemia – a system presenting exclusively increased circulating levels of leptin amongst all features of obesity, which allowed us to pinpoint the exclusive effects of leptin-SOCS3 ovarian hyperactivation during early-onset of obesity.

Leptin is a major adipokine, which was initially linked to satiety (6). The establishment of leptin resistance at different levels in the body has been documented in recent years as one of the outcomes of obesity. Accordingly, leptin signalling is deregulated in the hypothalamus (49) and liver of obese human and mice (50). However, the same was not found in kidney (51) or heart (52) of obese humans, suggesting an organ-specific response. We confirmed here, for the first time, the establishment of leptin resistance in the ovary of obese female mice. This poses very important questions on the long-term effects of obesity on ovarian performance, concerning the known local roles of leptin on follicular growth (12), ovulation (13), and oocyte quality (53). Leptin action in the ovary is highly intricate and its effects bimodal. Low leptin levels in circulation facilitate the transition from primary to secondary follicles (12), but leptin is also required for ovulation, possibly supporting CC expansion through cyclooxygenase (COX) 2 and hyaluronic acid synthase (HAS) 2 activity (13). Indeed, *ob/ob* mice contain antral follicles in their ovaries (data not shown), but fail to ovulate. Thus, during obesity progression, altered leptin signalling in the ovary could lead to functional failure and infertility through different mechanisms, mainly characterised by the hyperactivation of ObRb in the onset of obesity and complete failure in signalling in late obesity.

Our first aim was to elucidate the molecular mechanisms leading to the establishment of leptin resistance in the obese ovary. The analysis of different ObRb Tyr domains highlighted the decrease in pTyr985 along with pJAK2 in ovaries from 16 wk HFD mice, concomitant with the increase in SOCS3 protein and decrease in pSTAT5. Functionally, STAT5 phosphorylation in the mouse ovary was shown to be crucial for prolactin signalling and cell proliferation during follicular growth (54), as well as corpus luteum formation (55). Hence, reduced pSTAT5 signalling *per se* could compromise oocyte maturation and fertility during obesity. Importantly, we observed that SOCS3 staining in the oocyte occurred mainly in response to ObRb activation, since the *ob/ob* mouse presented weaker staining. This suggests a direct impact of disrupted ovarian leptin signalling on oocyte quality through SOCS3 activation. Indeed, at 16 wk DIO, we observed different levels of *Socs3* transcribed in various ovarian components. Our RNA-seq data revealed that *Socs3* was increased at 4 wk HFD, but decreased at 16 wk HFD in CCs, whereas in the TC fraction it was upregulated at both time points. This may suggest blunted ObRb signalling in CCs at 16 wks HFD, once the transcription of the major components of the pathway was inhibited (Figure supplement 9A). Therefore, leptin signalling in CCs seems to be highly sensitive to obesity and maternal metabolic performance.

Having an understanding of the impact of obesity on leptin signalling in the ovary, we then analysed the transcriptome of CCs from DIO mice. A major observation of this study was the striking correlation between BW and the global gene expression profile of CCs. On the other hand, other studies showed functional changes in the ovary, including depletion of primordial follicles and inflammation in HFD mice, irrespective of gain in BW (56). Differences in diet composition, as well as variable length of exposure to diet, might account for the differences between studies. Also the aforementioned study did not present a global gene expression analysis. Interestingly, when found that the expression profile of HFD-DEGs in the HFDLG CCs was similar to that in 16 wk CD, clearly demonstrating the impact of maternal BW, which probably largely reflects adiposity in this model, on gene expression in CCs.

Another major outcome of the transcriptome analysis of CCs was the identification of gene signatures altered in early vs late stages of obesity. After 4 wk HFD, mainly genes involved in glucose metabolism and cell membrane trafficking were differently expressed. The use of the pharmacologically hyperleptinemic model allowed us to dissect the contribution of hyperactivation of ObRb to the major changes taking place in CCs in early obesity. Increased activation of the JAK-STAT cascade seemed

mainly to impair cellular trafficking and paracrine transfer of macromolecules. This is known to be a crucial process for the metabolic cooperation between the oocyte and somatic cells (23). Cell trafficking and nutrient mobilisation to the oocyte, as well as the uptake of signalling molecules from the oocyte, is fundamental for COCs expansion and oocyte maturation (23). Indeed, the genes *Micall1* and *Unc-51 Like Kinase (Ulk) 4* are important mediators of endocytosis, and were shown to be regulated by *Stat3* (57,58). Furthermore, amongst the genes upregulated in both 4wk HFD and LEPT we found *Lcn2*, associated with lipid and hormone transport (59), *Claudine (Cldn) 22*, a component of tight junctions (60), and *Anxa11*, known to be involved in transmembrane secretion (61). This is suggestive of the effects of leptin in altering transmembrane transport in the early-onset of obesity.

We also identified the metabolic gene *Arachidonate 15-Lipoxygenase (Alox15)*, and the transcription factor *Hes Related Family BHLH Transcription Factor With YRPW Motif (Hey) 1*, were amongst the most significantly upregulated genes in both 4 wk HFD and LEPT (Table 10). The transcriptional repressor HEY1 is directly activated by Notch Receptor (NOTCH) 2 during follicular development, and both HEY1 and NOTCH2 were shown to be increased in proliferating granulosa cells and can contribute to ovarian overstimulation and premature follicular failure (62). These effects further demonstrate the detrimental role of increased ObRb activation during the onset of obesity in cell trafficking and immune response.

Amongst the downregulated signatures in both 4 wk HFD and LEPT we found genes that encoded for important epigenetic factors, such as *Tasor*, *Kmt2d/Mll2*, *Mbd2*, and *Dnmt3a* (Figure 4D, table 10), which could indicate epigenetic dysregulation in these cells in early obesity being mediated by leptin. Another striking result was the coordinate downregulation of genes involved in cytoskeleton and actin-filament organisation again in 4 wk HFD and LEPT. As in axons, microtubules form the cytoskeletal core of granulosa cell transzonal projections (TZPs), which provide tracks for the polarized translocation of secretory pathway organelles (63). Thus, by impairing the intrinsic stability of TZPs in granulosa cells, leptin could be affecting the paracrine exchanges between oocytes and somatic cells, an instrumental system for oocyte maturation (64). Indeed, the oocyte is in extreme need of the metabolites generated in CCs, but also signalling factors such as growth differentiation factor (GDF) 9 secreted by the oocyte and required to orchestrate CCs function. Leptin seemed to support the TCA cycle at 4 wk HFD (Figure supplement 9B), which suggested to us that at this early stage the boost in leptin signalling in CCs could actually have beneficial effects,

659 following the positive response on oocyte competence and GDF9 signalling (Figure  
660 supplement 9D). However, at 16 wk HFD the inferred drop in CC metabolic fitness was  
661 paralleled by a decrease in the main paracrine mediators of oocyte maturation and  
662 responsiveness to GDF9 (Figure supplement 9B-D), which invariably suggest  
663 compromised oocyte quality. The aforementioned events are an important part of COC  
664 expansion, a complex mechanism triggered by luteinizing hormone (LH), in which  
665 bidirectional exchange of metabolites and signalling factors between the oocyte and  
666 CCs leads to maturation of the gamete and resumption of meiosis (22). This process is  
667 tightly regulated by immune mediators, particularly interleukin (IL) 6 (65). Indeed, as  
668 well as being highlighted in our transcriptome analysis, the role of leptin in the  
669 inflammatory response, in particular mediating innate immunity through IL6, has been  
670 described before (55). Consequently, the detrimental effect of obesity could be related  
671 to increased leptin signalling at 4 wk HFD, but most likely through its failure at 16 wk  
672 HFD (Figure supplement 9A). Generally, in the early stages of obesity, leptin  
673 downregulated potentially important epigenetic mediators and genes involved in  
674 cytoskeletal organisation in CCs.

675 The analysis of 16 wk HFD DEGs, as well as the profile of temporal changes  
676 revealed genes involved in cell trafficking as *Micall1* or *Dync1h*, involved in protein  
677 transport, positioning of cell compartments, and movement of structures within the cell  
678 (66) to be decreased in 4 wk and 16 wk HFD. Furthermore, the most increased gene in  
679 16 wk HFD was the *Guanylate-binding protein (Gbp)* 8 (Table 7), a component of  
680 cellular response to interferon-gamma (67). Another gene upregulated at 16 wk HFD  
681 was *Rhou*, a gene that regulates cell morphology (68). Considering also the high  
682 expression level of inflammatory mediators at this stage, the activated pathways may  
683 well be an outcome of lipotoxicity previously described in the obese ovary (48). Thus,  
684 during obesity ovarian cells are trying to accommodate the surplus of lipid compounds,  
685 which is likely to activate mechanisms of cellular reorganisation. Overall, early changes  
686 in CC transport, gene expression and epigenetic regulation are followed by mounting  
687 inflammatory pathways and cellular rearrangement to accommodate the lipid surplus.

688 In conclusion, we found that the ovaries of obese mice develop leptin resistance  
689 and that global gene expression in CCs was strikingly correlated with BW.  
690 Mechanistically, failure in ovarian leptin signalling was mediated by SOCS3  
691 overexpression, and inhibition of pTyr985 and pJAK2. Initially, during the onset of  
692 obesity the hyperactivation of leptin signalling was linked to increased expression of  
693 genes for cell trafficking and cytoskeleton organisation, and inhibition of genes



694 associated with epigenetic regulations in CCs. Conversely, in late obesity, altered gene  
695 signatures were mainly linked to inflammatory response and morphological  
696 rearrangement (Figure 5). This analysis revealed for the first time the temporal changes  
697 in gene expression in CCs during obesity progression. Further studies are being  
698 undertaken to understand the impact of these changes in oocyte and early embryo  
699 development.

700

## 701 **ACKNOWLEDGEMENTS**

702 We would like to thank Dr Leslie Paul Kozak and Dr Magdalena Jura for their support  
703 with the validation and characterisation of the mouse obese phenotype; Dr Jorg Morf for  
704 the constructive discussion and suggestions on the analysis of the transcriptome data; Dr  
705 Daniel Murta for providing the of mouse ovarian slides; and Dr Fatima Santos and Dr  
706 Krzysztof Witek for their support with the imaging and confocal microscopy.

707

## 708 **STATEMENT OF ETHICS**

709 Animal experiments conform to internationally accepted standards and have been  
710 approved by the appropriate institutional review body.

711

## 712 **DISCLOSURE STATEMENT**

713 The authors have no conflict of interest to declare.

714

## 715 **FOUNDING SOURCES**

716 Work was supported by grants from the Polish National Centre for Science (No.  
717 2014/15/D/NZ4/01152 and 2016/23/B/NZ4/03737) awarded to A. G. and the UK  
718 Biotechnology and Biological Sciences Research Council and Medical Research  
719 Council (BBS/E/B/000C0423, MR/K011332/1, MR/S000437/1) awarded to G.K.; A. G.  
720 was supported by Horizon 2020 Marie Curie Individual Fellowship; Processing charge  
721 covered by the KNOW Consortium: “Healthy Animal - Safe Food” (Ministry of  
722 Sciences and Higher Education; Dec: 05-1/KNOW2/2015).

723

## 724 **AUTHORS CONTRIBUTION**

725 KW data acquisition, analysis and interpretation of the data, writing the manuscript; EW  
726 data acquisition, analysis and interpretation of the data; MA, data acquisition and  
727 analysis; JCF bioinformatic analysis and interpretation of data, revising the manuscript;  
728 GK supervision, funding, revising the manuscript; AG conception and design, funding

729 acquisition, acquisition of data, bioinformatic analysis and interpretation of data, writing  
730 and revising of the manuscript.

731

## 732 REFERENCES

733

- 734 1. Schelbert KB. Comorbidities of Obesity. *Prim Care Clin Off Pract*. 2009 Jun  
735 1;36(2):271–85.
- 736 2. Pasquali R, Patton L, Gambineri A. Obesity and infertility. *Curr Opin Endocrinol*  
737 *Diabetes Obes*. 2007 Dec;14(6):482–7.
- 738 3. Dağ ZÖ, Dilbaz B. Impact of obesity on infertility in women. *J Turkish Ger*  
739 *Gynecol Assoc*. 2015;16(2):111–7.
- 740 4. Unger RH, Zhou YT. Lipotoxicity of beta-cells in obesity and in other causes of  
741 fatty acid spillover. *Diabetes*. 2001 Feb 1;50 Suppl 1(suppl 1):S118-21.
- 742 5. Robker RL, Wu LL-Y, Yang X. Inflammatory pathways linking obesity and  
743 ovarian dysfunction. *J Reprod Immunol*. 2011 Mar;88(2):142–8.
- 744 6. Friedman JM, Halaas JL. Leptin and the regulation of body weight in mammals.  
745 *Nature*. 1998 Oct 22;395(6704):763–70.
- 746 7. Maffei M, Halaas J, Ravussin E, Pratley RE, Lee GH, Zhang Y, et al. Leptin  
747 levels in human and rodent: Measurement of plasma leptin and ob RNA in obese  
748 and weight-reduced subjects. *Nat Med*. 1995;1(11):1155–61.
- 749 8. Vaisse C, Halaas JL, Horvath CM, Darnell JE, Stoffel M, Friedman JM. Leptin  
750 activation of Stat3 in the hypothalamus of wild-type and ob/ob mice but not  
751 db/db mice. *Nat Genet*. 1996 Sep 1;14(1):95–7.
- 752 9. Cava A La, Matarese G. The weight of leptin in immunity. *Nat Rev Immunol*.  
753 2004 May 1;4(5):371–9.
- 754 10. Sierra-Honigsmann MR, Nath AK, Murakami C, Garcia-Cardena G,  
755 Papapetropoulos A, Sessa WC, et al. Biological action of leptin as an angiogenic  
756 factor 1. *Science* (80- ). 1998;281(0036-8075 (Print)):1683–6.
- 757 11. Quennell JH, Mulligan AC, Tups A, Liu X, Phipps SJ, Kemp CJ, et al. Leptin  
758 Indirectly Regulates Gonadotropin-Releasing Hormone Neuronal Function.  
759 *Endocrinology*. 2009 Jun;150(6):2805–12.
- 760 12. Panwar S, Herrid M, Kauter KG, McFarlane JR. Effect of passive immunization  
761 against leptin on ovarian follicular development in prepubertal mice. *J Reprod*  
762 *Immunol*. 2012 Dec 1;96(1–2):19–24.
- 763 13. Dupuis L, Schuermann Y, Cohen T, Siddappa D, Kalaiselvanraja A, Pansera M,

- 764 et al. Role of leptin receptors in granulosa cells during ovulation. *Reproduction*.  
765 2013 Dec 19;147(2):221–9.
- 766 14. Herrid M, Nguyen VL, Hinch G, McFarlane JR. Leptin has concentration and  
767 stage-dependent effects on embryonic development in vitro. *Reproduction*. 2006  
768 Aug 1;132(2):247–56.
- 769 15. Ryan NK, Woodhouse CM, Van der Hoek KH, Gilchrist RB, Armstrong DT,  
770 Norman RJ. Expression of Leptin and Its Receptor in the Murine Ovary: Possible  
771 Role in the Regulation of Oocyte Maturation1. *Biol Reprod*. 2002 May  
772 1;66(5):1548–54.
- 773 16. Klok C, Haq AK, Dunn SL, Lavery HJ, Banks AS, Myers MG. Regulation of  
774 Jak kinases by intracellular leptin receptor sequences. *J Biol Chem*. 2002 Nov  
775 1;277(44):41547–55.
- 776 17. Banks AS, Davis SM, Bates SH, Myers MG. Activation of downstream signals  
777 by the long form of the leptin receptor. *J Biol Chem*. 2000 May  
778 12;275(19):14563–72.
- 779 18. Mütze J, Roth J, Gerstberger R, Hübschle T. Nuclear translocation of the  
780 transcription factor STAT5 in the rat brain after systemic leptin administration.  
781 *Neurosci Lett*. 2007 May 7;417(3):286–91.
- 782 19. Bjørnbæk C, Lavery HJ, Bates SH, Olson RK, Davis SM, Flier JS, et al. SOCS3  
783 Mediates Feedback Inhibition of the Leptin Receptor via Tyr<sup>985</sup>. *J Biol Chem*.  
784 2000 Dec 22;275(51):40649–57.
- 785 20. Zabolotny JM, Bence-Hanulec KK, Stricker-Krongrad A, Haj F, Wang Y,  
786 Minokoshi Y, et al. PTP1B regulates leptin signal transduction in vivo. *Dev Cell*.  
787 2002 Apr;2(4):489–95.
- 788 21. Sugiura K, Pendola FL, Eppig JJ. Oocyte control of metabolic cooperativity  
789 between oocytes and companion granulosa cells: energy metabolism. *Dev Biol*.  
790 2005 Mar 1;279(1):20–30.
- 791 22. Dumesic DA, Meldrum DR, Katz-Jaffe MG, Krisher RL, Schoolcraft WB.  
792 Oocyte environment: follicular fluid and cumulus cells are critical for oocyte  
793 health. *Fertil Steril*. 2015 Feb;103(2):303–16.
- 794 23. Russell DL, Gilchrist RB, Brown HM, Thompson JG. Bidirectional  
795 communication between cumulus cells and the oocyte: Old hands and new  
796 players? *Theriogenology*. 2016 Jul 1;86(1):62–8.
- 797 24. Vigone G, Merico V, Prigione A, Mulas F, Sacchi L, Gabetta M, et al.  
798 Transcriptome based identification of mouse cumulus cell markers that predict

799 the developmental competence of their enclosed antral oocytes. *BMC Genomics*.  
800 2013;14(1):380.

801 25. Uyar A, Torrealday S, Seli E. Cumulus and granulosa cell markers of oocyte and  
802 embryo quality. In: *Fertility and Sterility*. 2013. p. 979–97.

803 26. Kyrölahti A, Vetter M, Euler R, Bielinska M, Jay PY, Anttonen M, et al.  
804 GATA4 Deficiency Impairs Ovarian Function in Adult Mice<sup>1</sup>. *Biol Reprod*.  
805 2011 May 1;84(5):1033–44.

806 27. Couse JF, Yates MM, Rodriguez KF, Johnson JA, Poirier D, Korach KS. The  
807 Intraovarian Actions of Estrogen Receptor- $\alpha$  Are Necessary to Repress the  
808 Formation of Morphological and Functional Leydig-Like Cells in the Female  
809 Gonad. *Endocrinology*. 2006 Aug;147(8):3666–78.

810 28. Koressaar T, Remm M. Enhancements and modifications of primer design  
811 program Primer3. *Bioinformatics*. 2007 May 15;23(10):1289–91.

812 29. Galvão A, Wolodko K, Rebordão MR, Skarzynski D, Ferreira-Dias G. TGF $\beta$ 1  
813 modulates in vitro secretory activity and viability of equine luteal cells. *Cytokine*.  
814 2018 Oct 1;110:316–27.

815 30. Zhao S, Fernald RD. Comprehensive Algorithm for Quantitative Real-Time  
816 Polymerase Chain Reaction. *J Comput Biol*. 2005 Oct 21;12(8):1047–64.

817 31. Picelli S, Björklund ÅK, Faridani OR, Sagasser S, Winberg G, Sandberg R.  
818 Smart-seq2 for sensitive full-length transcriptome profiling in single cells. *Nat*  
819 *Methods*. 2013 Nov 22;10(11):1096–8.

820 32. Picelli S, Faridani OR, Björklund ÅK, Winberg G, Sagasser S, Sandberg R. Full-  
821 length RNA-seq from single cells using Smart-seq2. *Nat Protoc*. 2014 Jan  
822 2;9(1):171–81.

823 33. Love MI, Huber W, Anders S. Moderated estimation of fold change and  
824 dispersion for RNA-seq data with DESeq2. *Genome Biol*. 2014 Dec  
825 5;15(12):550.

826 34. Duan J, Choi Y-H, Hartzell D, Della-Fera MA, Hamrick M, Baile CA. Effects of  
827 Subcutaneous Leptin Injections on Hypo-thalamic Gene Profiles in Lean and  
828 ob/ob Mice. 2007.

829 35. Eden E, Lipson D, Yogev S, Yakhini Z. Discovering Motifs in Ranked Lists of  
830 DNA Sequences. *PLoS Comput Biol*. 2007 Mar 23;3(3):e39.

831 36. Eden E, Navon R, Steinfeld I, Lipson D, Yakhini Z. GOrilla: a tool for discovery  
832 and visualization of enriched GO terms in ranked gene lists. *BMC Bioinformatics*.  
833 2009 Dec 3;10(1):48.

- 834 37. Assou S, Haouzi D, Mahmoud K, Aouacheria A, Guillemin Y, Pantesco V, et al.  
835 A non-invasive test for assessing embryo potential by gene expression profiles of  
836 human cumulus cells: a proof of concept study. *Mol Hum Reprod*. 2008 Dec  
837 1;14(12):711–9.
- 838 38. Gebhardt KM, Feil DK, Dunning KR, Lane M, Russell DL. Human cumulus cell  
839 gene expression as a biomarker of pregnancy outcome after single embryo  
840 transfer. *Fertil Steril*. 2011;96(1).
- 841 39. Assou S, Haouzi D, De Vos J, Hamamah S. Human cumulus cells as biomarkers  
842 for embryo and pregnancy outcomes. *Mol Hum Reprod*. 2010 Aug 1;16(8):531–8.
- 843 40. Iikuni N, Lam QLK, Lu L, Matarese G, La Cava A. Leptin and Inflammation.  
844 *Curr Immunol Rev*. 2008 May 1;4(2):70–9.
- 845 41. Faggioni R, Fantuzzi G, Fuller J, Dinarello CA, Feingold KR, Grunfeld C. IL-1 $\beta$   
846 mediates leptin induction during inflammation. *Am J Physiol Integr Comp*  
847 *Physiol*. 1998 Jan;274(1):R204–8.
- 848 42. Fantuzzi G, Faggioni R. Leptin in the regulation of immunity, inflammation, and  
849 hematopoiesis. *J Leukoc Biol*. 2000 Oct;68(4):437–46.
- 850 43. Cetica P, Pintos L, Dalvit G, Beconi M. Activity of key enzymes involved in  
851 glucose and triglyceride catabolism during bovine oocyte maturation in vitro.  
852 *Reproduction*. 2002 Nov;124(5):675–81.
- 853 44. Thompson JG, Lane M, Gilchrist RB. Metabolism of the bovine cumulus-oocyte  
854 complex and influence on subsequent developmental competence. *Soc Reprod*  
855 *Fertil Suppl*. 2007;64:179–90.
- 856 45. Sutton-McDowall ML, Gilchrist RB, Thompson JG. The pivotal role of glucose  
857 metabolism in determining oocyte developmental competence.  
858 *REPRODUCTION*. 2010 Apr;139(4):685–95.
- 859 46. Yamagishi S, Edelstein D, Du X, Kaneda Y, Guzmán M, Brownlee M. Leptin  
860 Induces Mitochondrial Superoxide Production and Monocyte Chemoattractant  
861 Protein-1 Expression in Aortic Endothelial Cells by Increasing Fatty Acid  
862 Oxidation via Protein Kinase A. *J Biol Chem*. 2001 Jul 6;276(27):25096–100.
- 863 47. Unger RH, Zhou YT, Orci L. Regulation of fatty acid homeostasis in cells: novel  
864 role of leptin. *Proc Natl Acad Sci U S A*. 1999 Mar 2;96(5):2327–32.
- 865 48. Wu LL-Y, Dunning KR, Yang X, Russell DL, Lane M, Norman RJ, et al. High-  
866 Fat Diet Causes Lipotoxicity Responses in Cumulus–Oocyte Complexes and  
867 Decreased Fertilization Rates. *Endocrinology*. 2010 Nov;151(11):5438–45.
- 868 49. Münzberg H, Flier JS, Bjørbaek C. Region-Specific Leptin Resistance within the

- 869 Hypothalamus of Diet-Induced Obese Mice. *Endocrinology*. 2004 Nov  
870 1;145(11):4880–9.
- 871 50. Brabant G, Müller G, Horn R, Anderwald C, Roden M, Nave H. Hepatic leptin  
872 signaling in obesity. *FASEB J*. 2005;19(8):1048–50.
- 873 51. Morgan DA, Thedens DR, Weiss R, Rahmouni K. Mechanisms mediating renal  
874 sympathetic activation to leptin in obesity. *Am J Physiol Integr Comp Physiol*.  
875 2008 Dec;295(6):R1730–6.
- 876 52. Mark AL, Correia MLG, Rahmouni K, Haynes WG. Selective leptin resistance: a  
877 new concept in leptin physiology with cardiovascular implications. *J Hypertens*.  
878 2002 Jul;20(7):1245–50.
- 879 53. Joo J-K, Joo B-S, Kim S-C, Choi J-R, Park S-H, Lee K-S. Role of leptin in  
880 improvement of oocyte quality by regulation of ovarian angiogenesis. *Anim*  
881 *Reprod Sci*. 2010 Jun;119(3–4):329–34.
- 882 54. Bouilly J, Sonigo C, Auffret J, Gibori G. Prolactin signaling mechanisms in  
883 ovary. *Mol Cell Endocrinol*. 2012 Jun 5;356(1–2):80–7.
- 884 55. Fernández-Riejos P, Najib S, Santos-Alvarez J, Martín-Romero C, Pérez-Pérez A,  
885 González-Yanes C, et al. Role of Leptin in the Activation of Immune Cells.  
886 *Mediators Inflamm*. 2010;2010:1–8.
- 887 56. Skaznik-Wikiel ME, Swindle DC, Allshouse AA, Polotsky AJ, McManaman JL.  
888 High-Fat Diet Causes Subfertility and Compromised Ovarian Function  
889 Independent of Obesity in Mice. *Biol Reprod*. 2016 May 1;94(5).
- 890 57. Pelkmans L, Fava E, Grabner H, Hannus M, Habermann B, Krausz E, et al.  
891 Genome-wide analysis of human kinases in clathrin- and caveolae/raft-mediated  
892 endocytosis. *Nature*. 2005 Jul 11;436(7047):78–86.
- 893 58. Giridharan SSP, Cai B, Vitale N, Naslavsky N, Caplan S. Cooperation of  
894 MICAL-L1, syndapin2, and phosphatidic acid in tubular recycling endosome  
895 biogenesis. Lemmon S, editor. *Mol Biol Cell*. 2013 Jun;24(11):1776–90.
- 896 59. Wang Y. Small lipid-binding proteins in regulating endothelial and vascular  
897 functions: focusing on adipocyte fatty acid binding protein and lipocalin-2. *Br J*  
898 *Pharmacol*. 2012 Feb;165(3):603–21.
- 899 60. Günzel D, Yu ASL. Claudins and the modulation of tight junction permeability.  
900 *Physiol Rev*. 2013;93(2):525–69.
- 901 61. Mirsaeidi M, Gidfar S, Vu A, Schraufnagel D. Annexins family: insights into  
902 their functions and potential role in pathogenesis of sarcoidosis. *J Transl Med*.  
903 2016 Dec 12;14(1):89.



- 904 62. Vanorny DA, Mayo KE. The role of Notch signaling in the mammalian ovary.  
905 Reproduction. 2017 Jun;153(6):R187–204.
- 906 63. Albertini DF, Combelles CM, Benecchi E, Carabatsos MJ. Cellular basis for  
907 paracrine regulation of ovarian follicle development. Reproduction. 2001  
908 May;121(5):647–53.
- 909 64. Li R, Albertini DF. The road to maturation: somatic cell interaction and self-  
910 organization of the mammalian oocyte. Nat Rev Mol Cell Biol. 2013 Mar  
911 22;14(3):141–52.
- 912 65. Liu Z, de Matos DG, Fan H-Y, Shimada M, Palmer S, Richards JS. Interleukin-6:  
913 An Autocrine Regulator of the Mouse Cumulus Cell-Oocyte Complex Expansion  
914 Process. Endocrinology. 2009 Jul;150(7):3360–8.
- 915 66. Vaisberg EA, Grissom PM, McIntosh JR. Mammalian cells express three distinct  
916 dynein heavy chains that are localized to different cytoplasmic organelles. J Cell  
917 Biol. 1996 May 1;133(4):831–42.
- 918 67. Tripal P, Bauer M, Naschberger E, Mörtinger T, Hohenadl C, Cornali E, et al.  
919 Unique Features of Different Members of the Human Guanylate-Binding Protein  
920 Family. J Interf Cytokine Res. 2007 Jan 31;27(1):44–52.
- 921 68. Tao W, Pennica D, Xu L, Kalejta RF, Levine AJ. Wrch-1, a novel member of the  
922 Rho gene family that is regulated by Wnt-1. Genes Dev. 2001 Jul  
923 15;15(14):1796–807.
- 924 69. Bilbao MG, Di Yorio MP, Faletti AG. Different levels of leptin regulate different  
925 target enzymes involved in progesterone synthesis. Fertil Steril. 2013  
926 Apr;99(5):1460–6.
- 927 70. Di Yorio MP, Bilbao MG, Pustovrh MC, Prestifilippo JP, Faletti AG. Leptin  
928 modulates the expression of its receptors in the hypothalamic-pituitary-ovarian  
929 axis in a differential way. J Endocrinol. 2008 Aug 1;198(2):355–66.
- 930 71. Yang W-H, Liu S-C, Tsai C-H, Fong Y-C, Wang S-J, Chang Y-S, et al. Leptin  
931 Induces IL-6 Expression through OBRI Receptor Signaling Pathway in Human  
932 Synovial Fibroblasts. Sanchez-Margalet V, editor. PLoS One. 2013 Sep  
933 27;8(9):e75551.
- 934 72. Loffreda S, Yang SQ, Lin HZ, Karp CL, Brengman ML, Wang DJ, et al. Leptin  
935 regulates proinflammatory immune responses. FASEB J. 1998;12(1):57–65.
- 936

1 Figure supplement 1. Wołodko et al., 2019

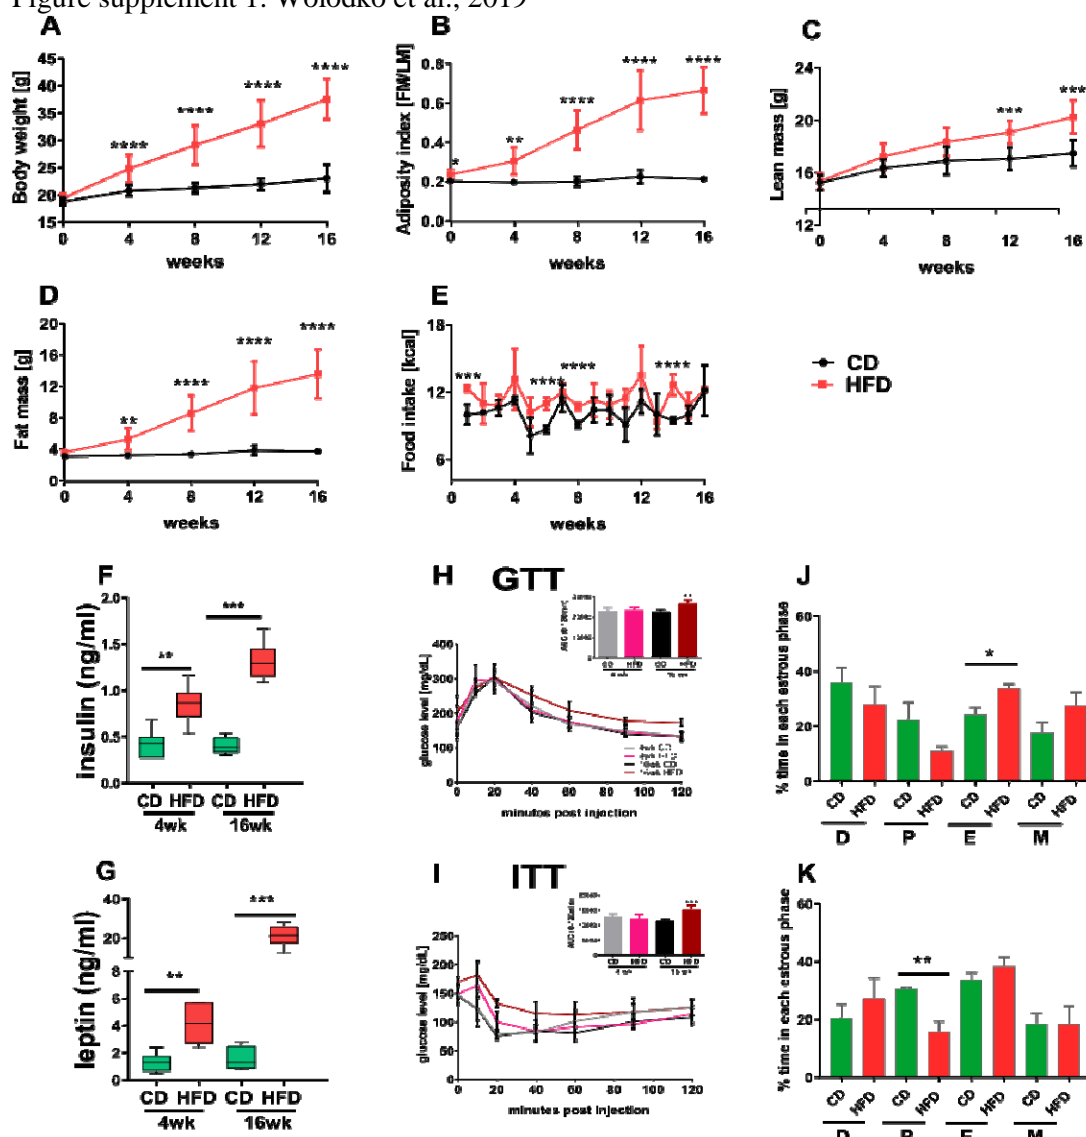

2 **Figure supplement 1. Phenotype characterisation of diet-induced obese mice.**

3 Changes in (A) body weight, (B) adiposity index, (C) lean mass, (D) fat mass, (E) food  
4 intake in mice fed chow diet (CD, black line) and high fat diet (HFD, red line) for 4 or  
5 16 weeks (wk). Plasma level of (F) insulin and (G) leptin in mice fed CD or HFD for 4  
6 and 16 wk. Glucose tolerance test (GTT, H) and insulin tolerance test (ITT, I) present  
7 glucose levels at 0-120 min after glucose and insulin injection, respectively. Bar graphs  
8 in the upper right panel present area under the curve for each group. Plasma collected  
9 from animals in oestrus phase. Proportion of time spent in each oestrous phase of mice  
10 subjected to CD or HFD for 4 wk (J) and 16 wk (K) monitored for 12 days. D,  
11 dioestrus; E, oestrus; M, metoestrus; P, pro-oestrus. Each bar represents the mean  $\pm$  SD  
12 for n=12. Differences in phenotype characteristics and plasma hormone level between  
13 groups were analysed by Mann-Whitney test, oestrous cycle distribution analysed by  
14 unpaired t-test. \* p<0.05; \*\* p<0.01; \*\*\*p<0.001.

19 Figure supplement 2. Wołodko et al. 2019

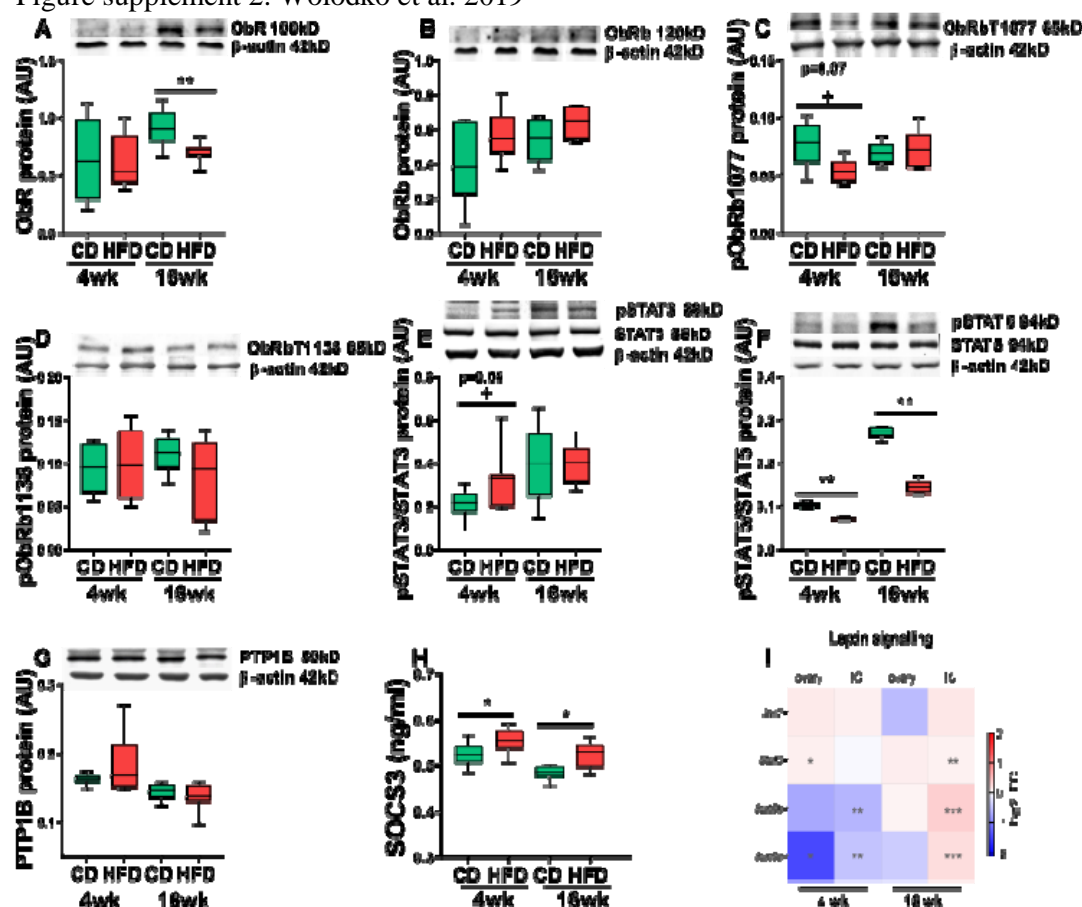

22 Figure supplement 2. Expression of leptin signalling components in the ovary of  
23 diet induced obese mice.

24 Protein abundance of components of the leptin signalling pathway in ovarian extracts  
25 analysed by Western blot or ELISA. Animals were maintained on chow diet (CD) or  
26 high fat diet (HFD) for 4 or 16 weeks (wk). Abundance of (A) leptin receptor (ObR),  
27 phosphorylation of (B) long isoform of leptin receptor (ObRb), (C) tyrosine 1077 of  
28 leptin receptor, (D) tyrosine 1138 of leptin receptor, (E) STAT3, (F) STAT5, expression  
29 of (G) PTP1B. (H) SOCS3 ovarian quantification in ELISA test. (I) Heatmap showing  
30 fold of change in expression of mRNA of leptin signalling components measured in  
31 whole ovary or theca/stroma enriched (TC) fraction by RT-PCR. mRNA expression of  
32 *Rpl37* and protein expression of  $\beta$ -actin were used to normalize the expression data.  
33 Each bar represents the mean  $\pm$  SD. Differences between groups were analysed by  
34 Mann-Whitney test. N=4-8 for immunoblots and N=8 for RT-PCR analysis and ELISA.  
35 \* p<0.05; \*\* p<0.01; \*\*\*p<0.001; + p=0.06 or p=0.07.

Figure supplement 3. Wołodko et al., 2019

40

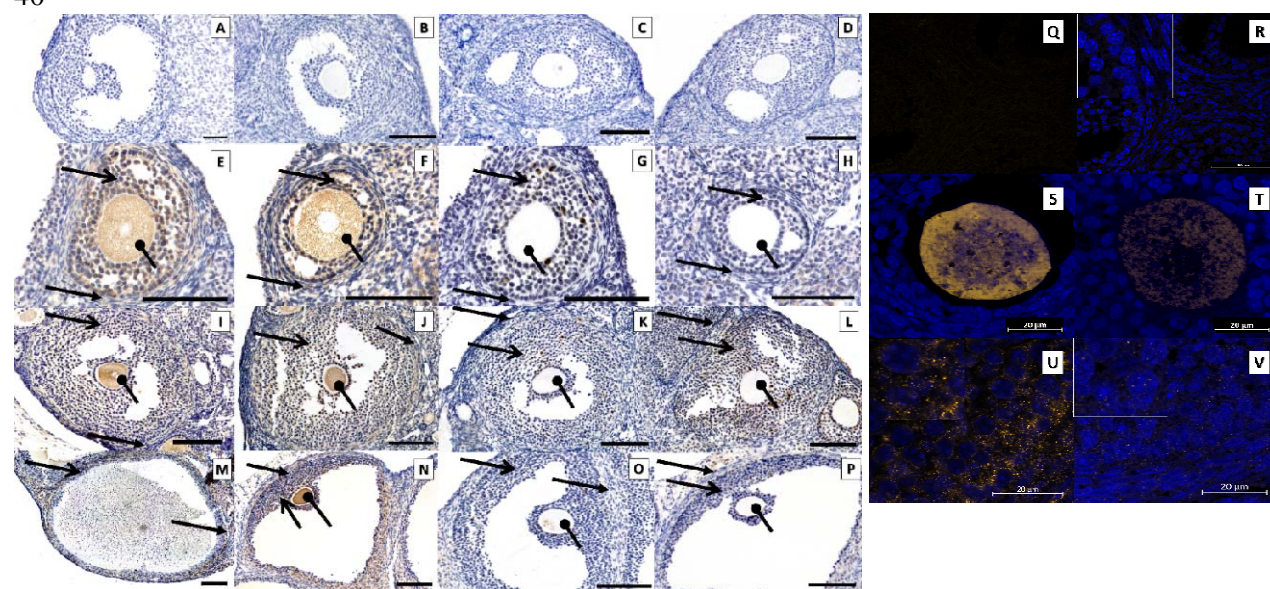

44

45 **Figure supplement 3. Immunolocalisation of SOCS3 and PTP1B protein in the**  
46 **ovary.**

47 Immunohistochemical localisation of SOCS3 and PTP1B protein during follicle  
48 development in mice fed chow diet (CD) or high fat diet (HFD) for 4 and 16 weeks  
49 (wk) and intraperitoneally injected with saline (C) or leptin (L) for 16 days (d). Positive  
50 staining in brown, counterstaining with heamatoxylin. Negative control stained with  
51 polyclonal rabbit IgG (A, B) 4 wk CD, (C, D) 4 wk HFD, localisation in secondary  
52 follicle SOCS3 (E) 4 wk CD and (F) 4 wk HFD, PTP1B (G) 4 wks CD, (H) 4 wks HFD,  
53 antral follicles SOCS3 (I) 16 wk CD, (J) 16 wk HFD, PTP1B (K) 16 wk CD, (L) 16 wk  
54 HFD, preovulatory follicle SOCS3 (M) 16 C, (N) 16 L, PTP1B (O) 16 C, (P) 16 L. The  
55 scale bar represents 100µm. The specificity of SOCS3 staining was confirmed by  
56 immunofluorescent localisation in *ob/ob* mice with genetic deficiency of leptin. Positive  
57 staining in orange, nuclear counterstaining with DAPI in blue. (Q-R) negative control  
58 16 wk CD performed with polyclonal rabbit IgG, SOCS3 localised in (S, T) secondary  
59 follicle and (U,V) antral follicle from controls (*ob/ob*. +/+; S,U) and leptin deficient  
60 ovaries (*ob/ob* -/-; T,V). Images are representatives of 3 biological replicates. Inserts in  
61 left top corners are the amplifications of granulosa cells. Pictures are representatives of  
62 3 biological replicates. The scale bar represents 20µm.

63

64

65 Figure supplement 4. Wołodko et al., 2019  
66

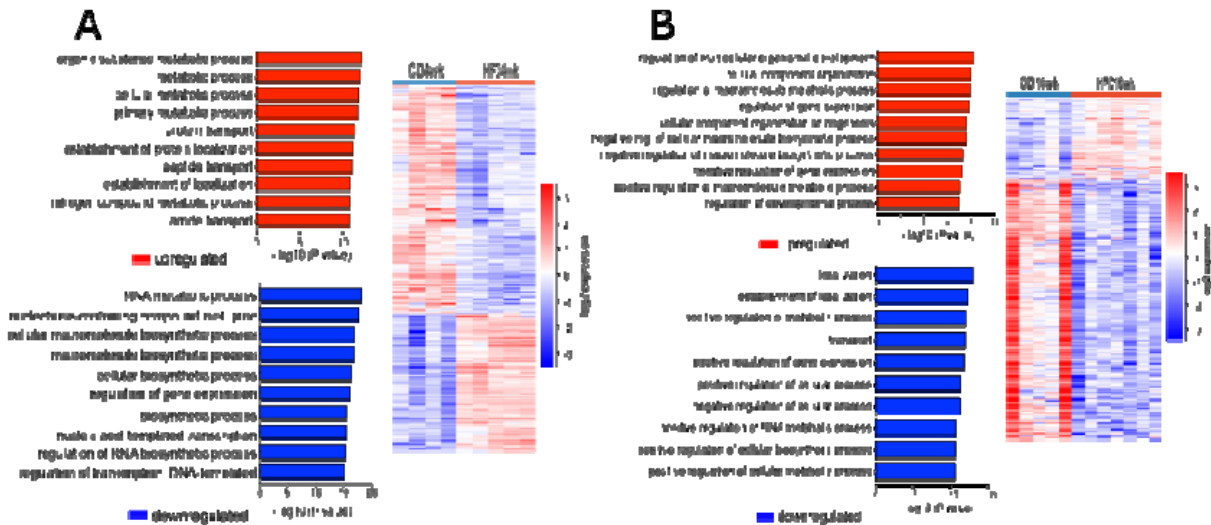

67  
68 **Figure supplement 4. Differentially expressed genes and associated pathways in**  
69 **cumulus cells from diet- induced obesity protocol.**  
70 DESeq2 analysis of transcriptome data in cumulus cells obtained from mice after 4 or  
71 16 weeks (wk) of chow diet (CD) or high fat diet (HFD). N= 3-7 mice per group.  
72 On the right heatmap showing hierarchical clustering of (A) 997 differentially expressed  
73 genes after submitting mice to 4 weeks of CD and HFD, (B) 846 differentially  
74 expressed genes after submitting mice to 16 weeks of CD and HFD. On the left  
75 presentation of pathways of genes with the most significant enrichment after gene  
76 ontology analysis. Gene ontology analysis performed with Gene Ontology Enrichment  
77 Analysis and Visualisation Tool.  
78  
79  
80

Figure supplement 5. Wołodko et al., 2019

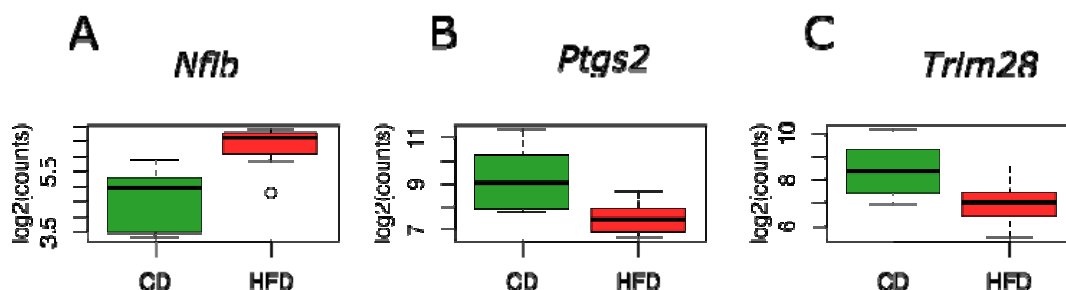

**Figure supplement 5. Oocyte competence and embryo quality markers differentially expressed in cumulus cells from mice with late obesity.**

DESeq2 analysis of transcriptome data in cumulus cells obtained from mice after 16 weeks of chow diet (CD) or high fat diet (HFD). N= 3-7 mice per group.

Expression of embryo quality markers (A) *nuclear factor I B (Nfib)*, (B) *cyclooxygenase 2 (Ptgs2)* and oocyte competence marker (C) *tripartite motif containing 28 (Trim28)*.

Log2 of counts.



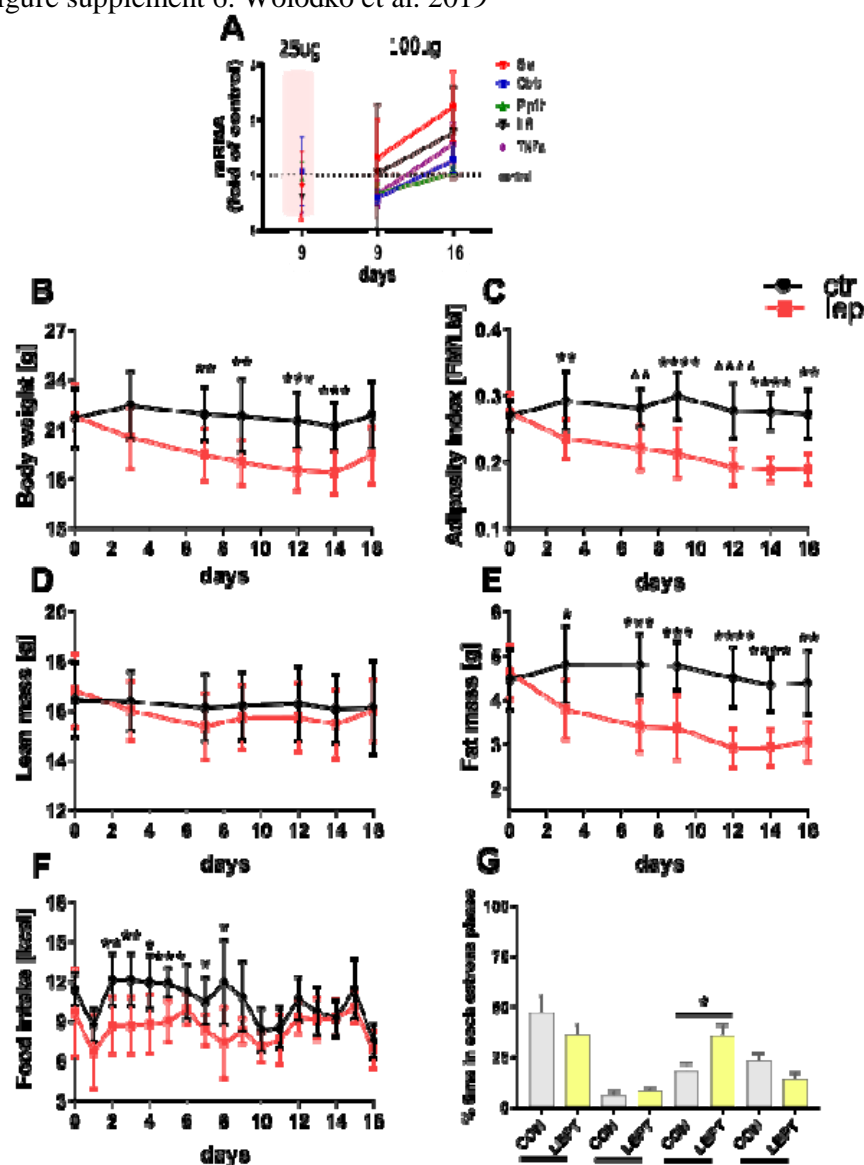

# **Figure supplement 6. Pharmacologically hyperleptinemic mouse model validation.**

In order to validate the length of the treatment and the dose of leptin, we analysed whole ovary mRNA from animals treated with 25 or 100 µg of leptin for 9 or 16 d. Injection of 100 µg for 16 days caused changes in the abundance of leptin-responsive transcripts (69–72) in ovarian extracts collected from animals in oestrous stage. Animals were injected with saline (C) or different doses of leptin (L) for 9 or 16 days (d). (A) mRNA level of *steroidogenic acute regulatory protein (Star)*, *long isoform of leptin receptor Oob*, *protein tyrosine phosphatase non-receptor type 1 (Ptp1b)*, *interleukin 6 (Il6)*, *tumor necrosis factor α (Tnfa)* expressed as fold of control after injecting animals for 9 or 16 days with 25µg or 100 µg of leptin. Changes in (B) body weight, (C) adiposity index, (D) lean mass, (E) fat mass, (F) food intake in mice intraperitoneally injected with saline (ctr, black line) or leptin (lep, red line) for 16 days. (G) Proportion of time spend in each oestrous phase of hyperleptinemic mice. D, dioestrus; E, oestrus; M, metoestrus; P, pro-oestrus. Each bar represents the mean ± SD. Differences in phenotype characteristics between groups were analysed by Mann-Whitney test, oestrous cycle distribution analysed by unpaired t-test. Data show mean values for n=10. \* p<0.05; \*\* p<0.01; \*\*\*p<0.001

115 Figure supplement 7. Wołodko et al., 2019

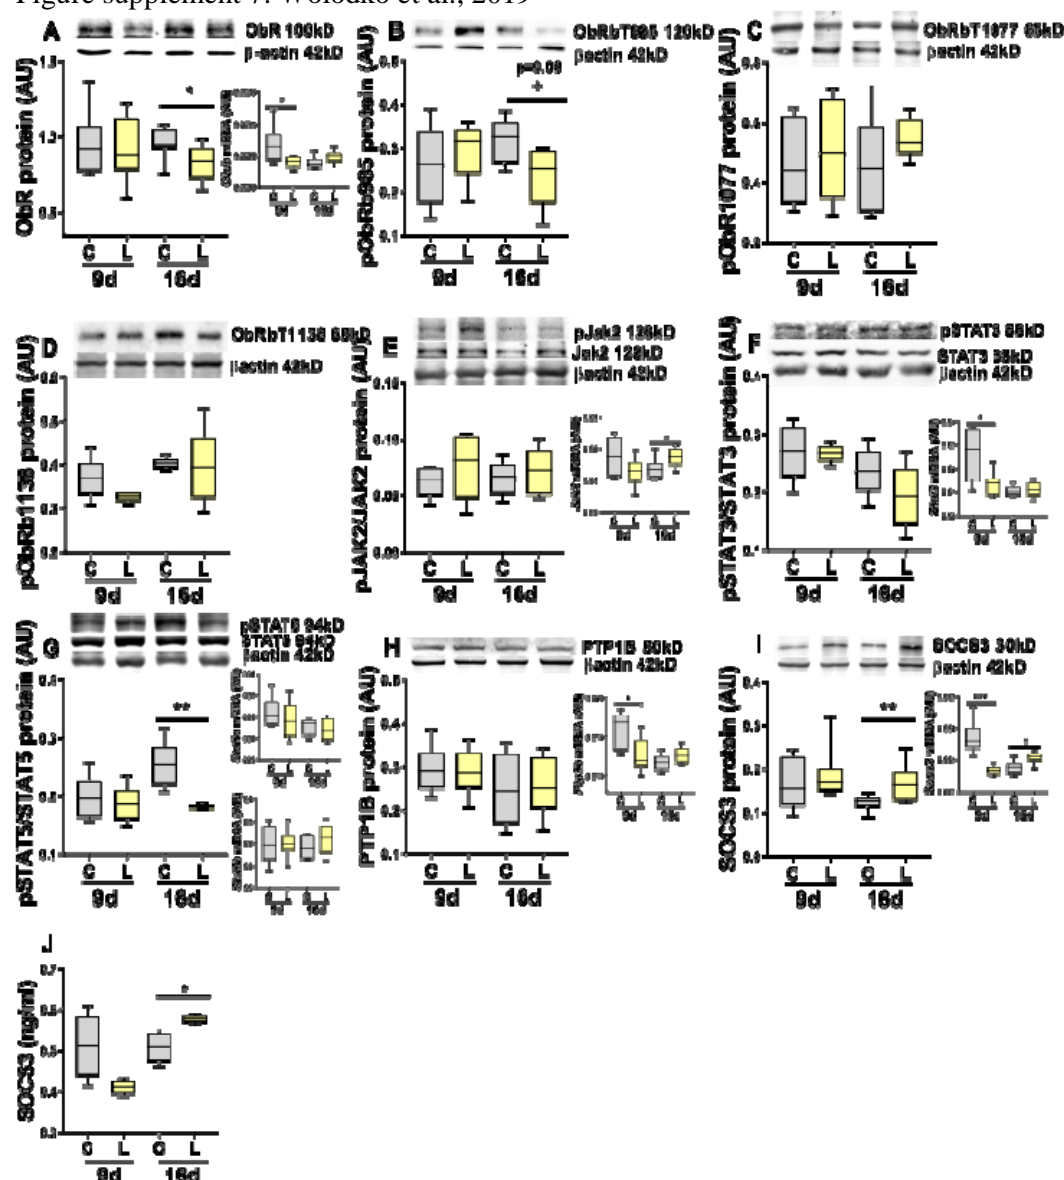

116  
117 **Figure supplement 7. Expression of leptin signalling components in the ovary of**  
118 **pharmacologically hyperleptinemic mice.**

119 Abundance of mRNA (grey box) and protein of leptin signalling pathway components  
120 in ovarian extracts collected from animals injected with saline (C) or 100 µg of leptin  
121 (L) for 9 or 16 days (d) and sacrificed in oestrus stage. Expression of (A) leptin receptor  
122 (ObR), phosphorylation of (B) tyrosine 985 of leptin receptor, (C) tyrosine 1077 of  
123 leptin receptor, (D) tyrosine 1138 of leptin receptor, (E) Janus kinase 2 (JAK2), (F)  
124 signal transducer and activator of transcription 3 (STAT3), (G) STAT5, expression of  
125 (H) protein tyrosine phosphatase 1B (PTP1B) and (I) suppressor of cytokine signalling  
126 3 (SOCS3) determined by real-time PCR and Western blot. (J) SOCS3 ovarian  
127 quantification in animals in oestrus stage determined by ELISA. mRNA expression of  
128 *Rpl37* and protein expression of  $\beta$ -actin was used to normalize the expression data. Each  
129 bar represents the mean  $\pm$  SD. Differences between groups were analysed by Mann-  
130 Whitney test. N=4-8 for immunoblots and N=8 for RT PCR analysis and ELISA. \*  
131  $p < 0.05$ ; \*\*  $p < 0.01$ ; \*\*\*  $p < 0.001$ ; +  $p = 0.09$ .  
132

Figure supplement 8. Wołodko et al., 2019

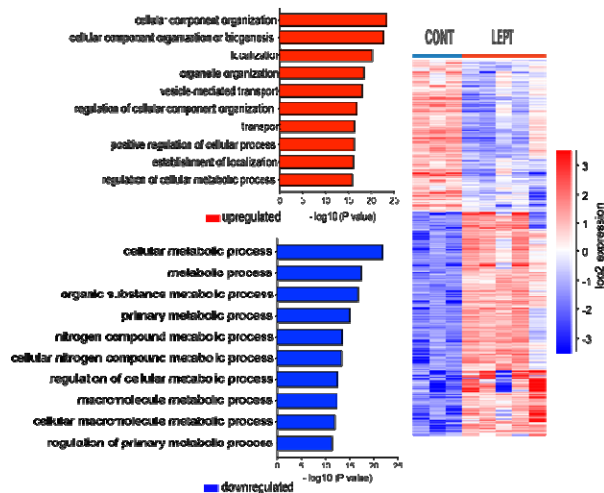

**Figure supplement 8. Differentially expressed genes and associated pathways in cumulus cells from hyperleptinemic mice.**

DESeq2 analysis of transcriptome data in cumulus cells obtained from mice treated with saline (CONT) and leptin (LEPT). N= 3-7 mice per group.

On the right heatmap showing hierarchical clustering of 2026 differentially expressed genes after treating mice with leptin for 16 days. On the left presentation of pathways of genes with the most significant relevance after gene ontology analysis. Gene ontology analysis performed with Gene Ontology Enrichment Analysis and Visualisation Tool.

161 Figure supplement 9. Wołodko et al., 2019

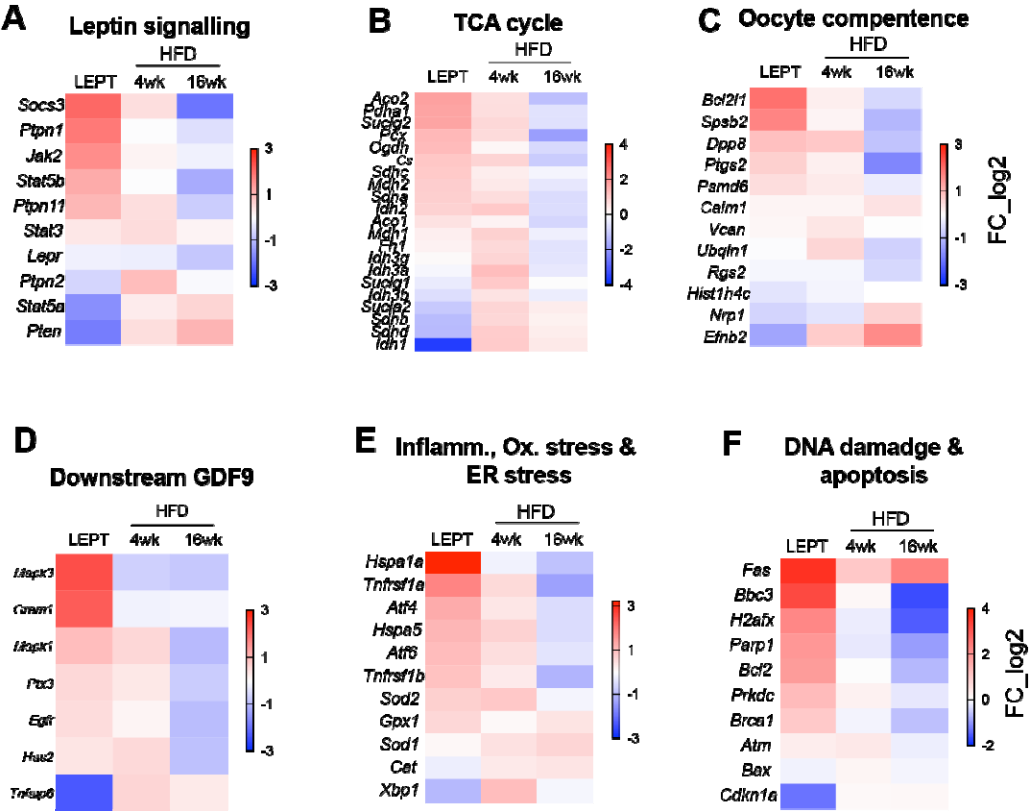

162  
163  
164 **Figure supplement 9. Similarities between profiles of genes differentially expressed**  
165 **in cumulus cells in diet induced- obese mice and leptin treated mice.**

166 DESeq2 analysis of transcriptome data in cumulus cells (CC) obtained from mice  
167 treated with saline (CONT) and leptin (LEPT) or after 4 or 16 weeks (wk) of chow diet  
168 (CD) or high fat diet (HFD). N= 3-7 mice per group. Heatmaps representing fold  
169 change in expression of genes associated with the following pathways or processes: (A)  
170 leptin signalling, (B) tricarboxylic acid (TCA) cycle, (C) oocyte competence, (D) genes  
171 regulated by oocyte-derived growth differentiation factor (GDF) 9, (E) inflammation,  
172 oxidative stress and endoplasmic reticulum stress, (F) DNA damage and apoptosis in  
173 CC. log<sub>2</sub>\_FC of reads per million (RPM)

174  
175  
176  
177

1 Figure 1 Wołodko et al., 2019

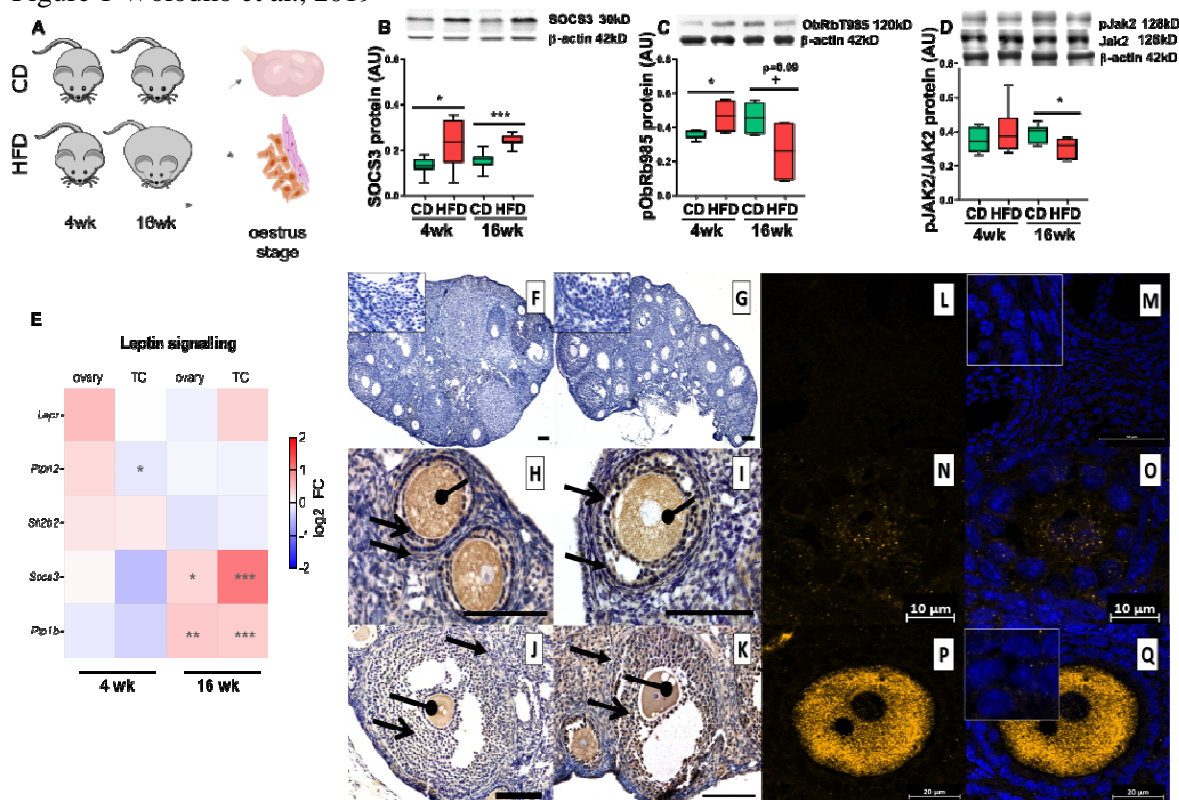

2  
3 **Figure 1. The establishment of leptin resistance in the ovary of diet induced obese**  
4 **mice.**

5 (A) Experimental design: animals were maintained on chow diet (CD) or high fat diet  
6 (HFD) for 4 weeks (wk) or 16 wk. Western blots with quantification, showing (B) total  
7 protein for SOCS3 (C) phosphorylation of tyrosine 985 of leptin receptor and (D)  
8 phosphorylation of Janus kinase 2. (E) Heatmap showing fold change in expression of  
9 mRNA of leptin signalling components measured in whole ovary or theca and stroma  
10 enriched (TC) fraction determined by RT-PCR. Immunohistochemical localisation of  
11 SOCS3 protein during follicle development in ovaries of mice subjected to diet-induced  
12 obesity (4 wk and 16 wk). Positive staining in brown, counterstaining with  
13 heamatoxylin. Negative control stained with polyclonal rabbit IgG (F) 4 wk CD and (G)  
14 4wk HFD, localisation of SOCS3 in primary follicle (H) 4 wk CD and (I) 4 wk HFD,  
15 antral follicles (J) 16 wk CD and (K) 16 wk HFD. Staining is present in oocyte,  
16 granulosa and theca cells. Oval-headed arrow indicates oocyte; large-headed arrow  
17 indicates granulosa cells and small-headed arrow indicates theca cells. Scale bars  
18 represent 100µm. The staining was confirmed by immunofluorescent localisation of  
19 SOCS3 (L-Q). Positive staining in orange, nuclear counterstaining with DAPI in blue.  
20 (L-M) negative control 16 wk CD performed with polyclonal rabbit IgG, SOCS3  
21 localised in (N-O) primordial follicles 16 wk CD, (P-Q) primary follicles 16 wk CD.  
22 Images are representatives of 3 biological replicates. Inserts in left top corners are  
23 magnifications of granulosa cells. mRNA expression of *Rpl37* and protein expression of  
24 β-actin were used to normalize the expression data. Each bar represents the mean ± SD.  
25 Differences between groups were analysed by Mann-Whitney test. N=4-8 for  
26 immunoblots and N=8 for RT-PCR analysis. \* p<0.05; \*\* p<0.01; \*\*\*p<0.001; +  
27 p=0.09.  
28

29 Figure 2 Wołodko et al., 2019

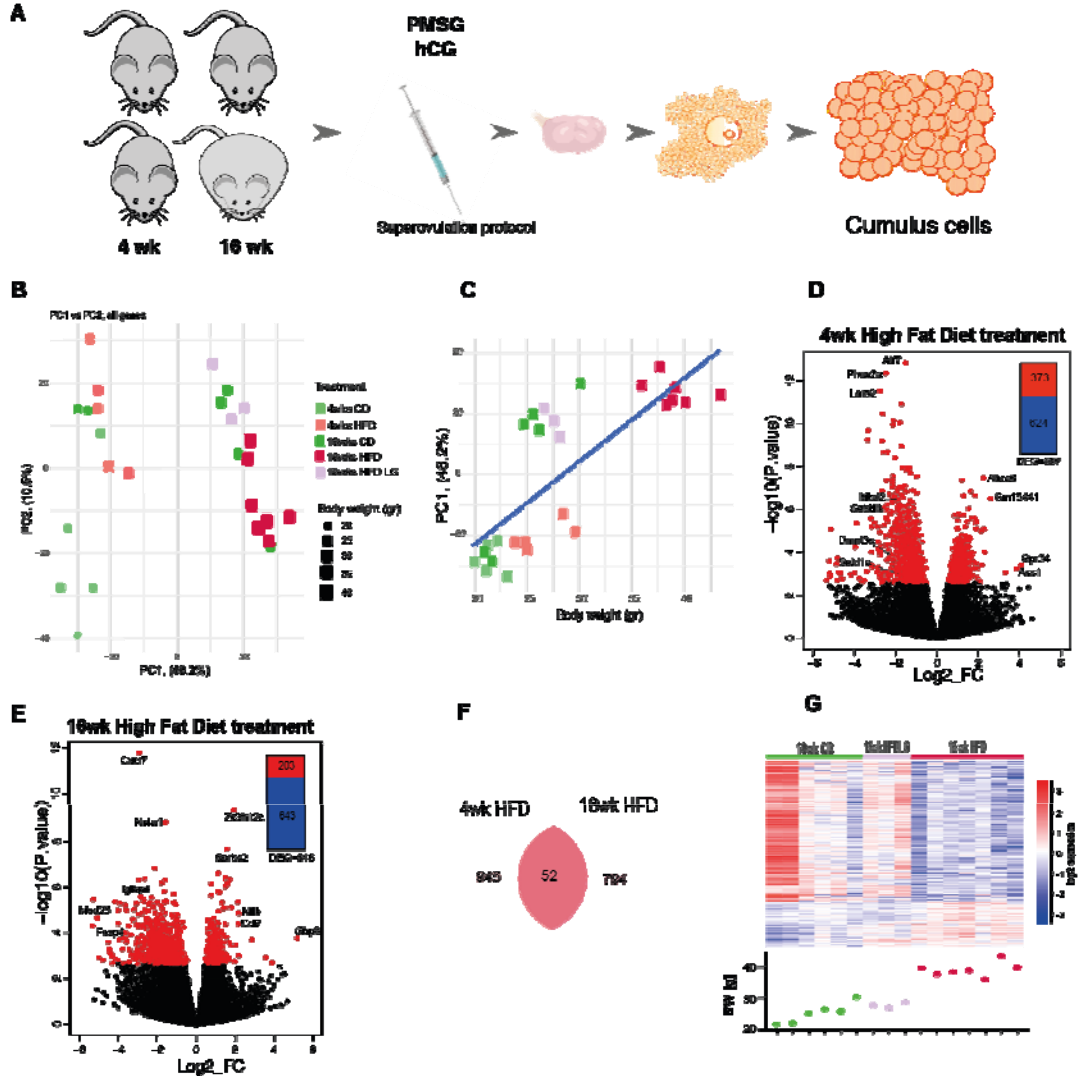

30  
31 **Figure 2. Cumulus cell transcriptome analysis in diet induced-obese mice reveals**  
32 **strong correlation with body weight.**

33 (A) Experimental design: mice were subjected to the indicated dietary protocol,  
34 superovulated and cumulus cells were collected from cumulus-oophorus-complexes.  
35 RNA-seq analysis of gene expression in cumulus cells obtained from mice after 4 or 16  
36 weeks (wk) on chow diet (CD), high fat diet (HFD) or low gainers on HFD (HFDLG).  
37 N= 3-7 mice per group. (B) Principal component analysis of global transcriptome shows  
38 samples cluster into 2 groups accordingly to their body weight (BW). (C) Correlation of  
39 Principal Component 1 (PC1) with BW;  $r=0.777$ ,  $p=3.026e-06$ . Volcano plots showing  
40 distribution of differentially expressed genes in (D) 4wks HFD and (E) 16wks HFD;  
41 genes with False Discovery Rate  $<0.05$  coloured red. (F) Venn diagram showing the  
42 number of genes differentially expressed at false discovery rate (FDR)  $<0.05$  between 4  
43 wk and 16 wk groups. (G) Heatmap of 846 DEGs identified by DESeq2 analysis  
44 between 16wk CD and HFD CCs, including data for HFDLG CC samples, with BW of  
45 mice at time of collection plotted below. Heatmap representing fold of change of gene  
46 expression.  $\log_2\_FC$  of reads per million (RPM).  
47



48 Figure 3 Wołodko et al., 2019

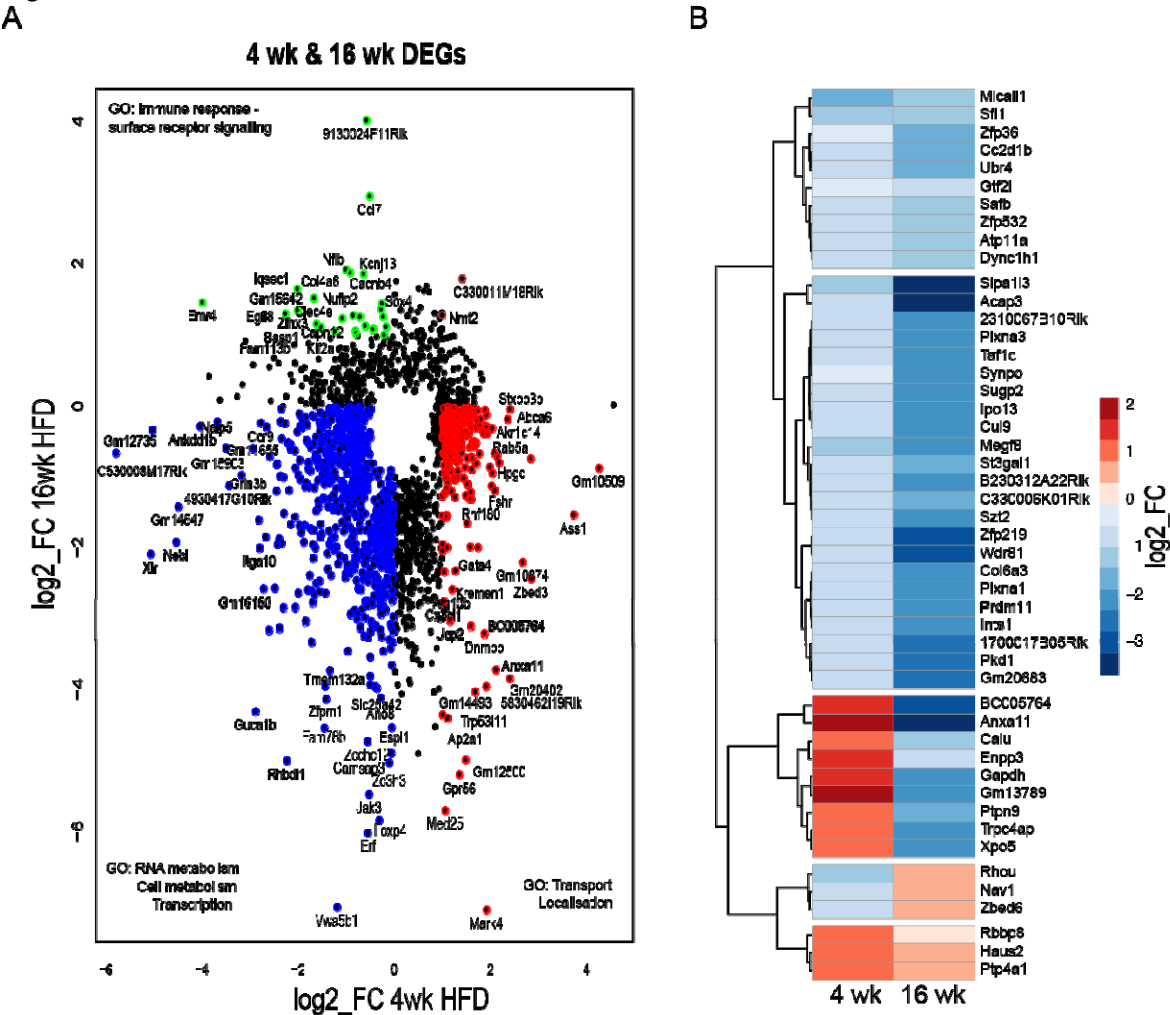

49  
50 **Figure 3. Temporal changes in the transcriptome of cumulus cells during obesity**  
51 **progression.**

52 DESeq2 analysis of transcriptome data in cumulus cells (CC) of mice fed high fat diet  
53 (HFD) for 4 or 16 weeks (wk). N= 3-7 mice per group. (A) Scatter plot presents genes  
54 differentially expressed in at least one condition (False Discovery Rate <0.05) in CC  
55 after 4 wk (997 genes) or 16 wk HFD (846 genes). Genes coloured blue are  
56 downregulated after both 4wk and 16wk HFD; green downregulated after 4 wk HFD  
57 and upregulated after 16wk HFD; brown upregulated after both 4 wk HFD and after  
58 16wk; red upregulated after 4 wk HFD and downregulated after 16 wk HFD. (B)  
59 Heatmap presents hierarchical clustering of genes significantly changed in both 4 and  
60 16 wk HFD normalised by average control fed chow diet. Genes cluster in group  
61 downregulated after 4 wk and 16 wk HFD, group upregulated after 4 wk and  
62 downregulated after 16 wk HFD, group downregulated after 4 wk and upregulated after  
63 16wk HFD and group upregulated after both 4 wk and 16 wk HFD. Gene ontology  
64 analysis performed with Gene Ontology Enrichment Analysis and Visualisation Tool.  
65 log2\_FC of reads per million (RPM).  
66

67 Figure 4 Wołodko et al., 2019

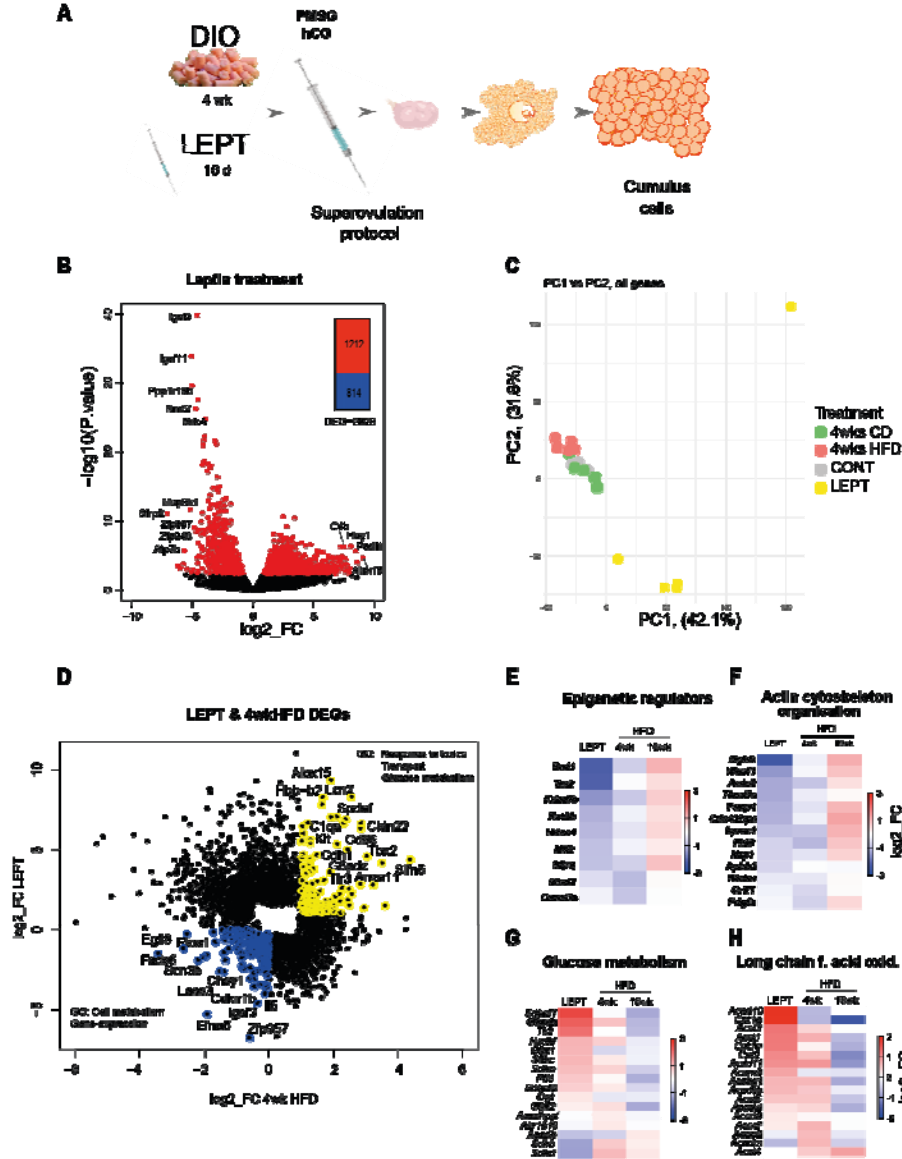

68  
69 **Figure 4. Pharmacologically hyperleptinemic mouse model shows leptin effects in**  
70 **the transcriptome of cumulus cells during early obesity .**

71 (A) Experimental design: mice were fed chow diet (CD) or high fat diet (HFD) for 4

72 weeks (wk) (4 wk DIO) or injected with saline (CONT) or 100µg of leptin (LEPT) for

73 16 days, followed by superovulation and collection of cumulus cells from cumulus-

74 oophorus-complexes. RNA-seq analysis of gene expression in cumulus cells. N=3-7

75 mice per group. (B) Volcano plots showing distribution of differentially expressed

76 genes in LEPT group; genes with False Discovery Rate <0.05 coloured red. (C)

77 Principal component analysis of global transcriptome shows LEPT effect is the main

78 source of variance in the data (first principal component, PC1). DESeq2 analysis of

79 transcriptome data in cumulus cells. (D) Scatter plot presents genes differentially

80 expressed in cumulus cells in LEPT or in 4 wk HFD, with False Discovery Rate <0.05.

81 Those coloured blue are down-regulated both in response to leptin treatment and 4 wk

82 HFD; those in yellow upregulated by both treatments. Heatmaps presenting fold of

83 change in expression of genes associated with the following pathways: (E) epigenetic

84 regulation; (F) actin cytoskeleton organisation; (G) glucose metabolism; (H) long chain

85 fatty acid oxidation in CC. Gene ontology analysis performed with Gene Ontology

86 Enrichment Analysis and Visualisation Tool. log<sub>2</sub>FC of reads per million (RPM)

87 Figure 5 Wołodko et al., 2019

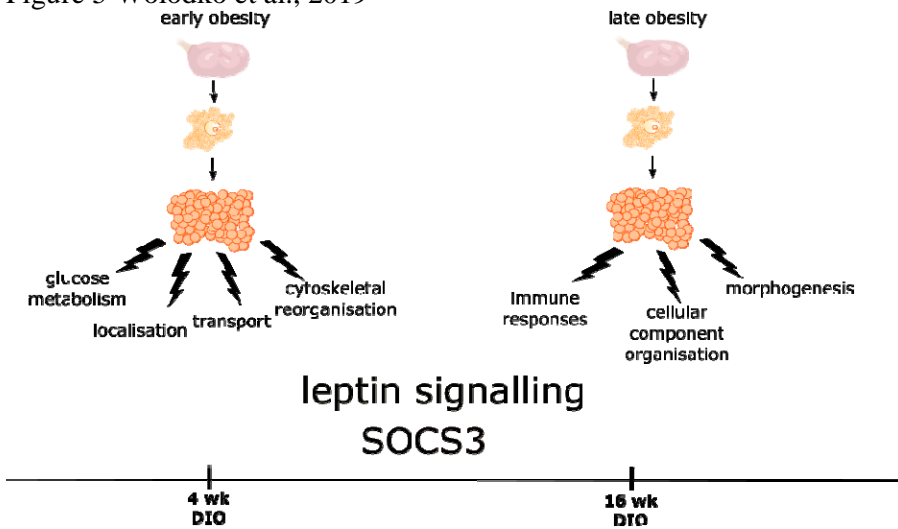

88  
89 **Figure 5. Graphical representation of the main temporal changes in the ovary of**  
90 **obese mice.**

91 During early obesity (4 weeks of diet-induced obesity, DIO) increased leptin signalling  
92 affects the transcriptome of cumulus cells (CCs). RNA-seq analysis revealed mainly  
93 alterations in genes involved in membrane trafficking, cytoskeleton organisation and  
94 glucose metabolism. During late obesity (16 wk DIO) leptin resistance is established,  
95 which causes accumulation of SOCS3 in the ovary. Transcriptome analysis of CCs at  
96 this timepoint indicated the activation of the inflammatory response and cellular  
97 anatomical morphogenesis, with inhibition of metabolism and transport.

98  
99
